# Supplementary material for: Measures and Metrics for Feasibility of Proof-of-Concept Studies With Human Immunodeficiency Virus Rapid Point-of-Care Technologies: The Evidence and the Framework
Source: Point Care. 2017 Nov 14;16(4):141–50. doi: 10.1097/POC.0000000000000147 (PMC5737458; doi:10.1097/POC.0000000000000147)
Supplement: SUPPLEMENTARY MATERIAL [file poc-16-141-s003.pdf]

**Table 1a:** Table of included studies on acceptability

| Study                              | Setting                                                                                           | Study design and population                                                                                                              | Outcome Reported                                                                                                                                                                                                                                                                          | Definition of acceptability used by the authors                                                                                                                                                                       | Reporting                           |
|------------------------------------|---------------------------------------------------------------------------------------------------|------------------------------------------------------------------------------------------------------------------------------------------|-------------------------------------------------------------------------------------------------------------------------------------------------------------------------------------------------------------------------------------------------------------------------------------------|-----------------------------------------------------------------------------------------------------------------------------------------------------------------------------------------------------------------------|-------------------------------------|
| Anaya et al., 2010 <sup>1</sup>    | 9 shelters of the Los Angeles Homeless Services Authority                                         | Randomized controlled trial with homeless veterans using the shelters                                                                    | 97/136 (71.3%)                                                                                                                                                                                                                                                                            | Proportion of participants that accepted testing                                                                                                                                                                      | Proportion; no interval estimation  |
| Arfai et al., 2011 <sup>2</sup>    | Urban ED                                                                                          | Survey with patients above 13 years-old                                                                                                  | 406/2384 (17%)                                                                                                                                                                                                                                                                            | Proportion of participants that consented to test                                                                                                                                                                     | Proportion; no interval estimation  |
| Ashby et al., 2010 <sup>3</sup>    | United Kingdom                                                                                    | Survey with patients of a polyclinic serving a highly migrant urban population                                                           | 71/93 (76%)                                                                                                                                                                                                                                                                               | Number of individuals that accepted to test among those that were approached                                                                                                                                          | Proportion; no interval estimation  |
| Batey et al., 2012 <sup>4</sup>    | Alabama, USA                                                                                      | Interviews with individuals presenting to a Level I trauma and academic medical center                                                   | 186/247 (64.6%)                                                                                                                                                                                                                                                                           | Proportion of participants that consented to test                                                                                                                                                                     | Proportions; no interval estimation |
| Beckwith et al., 2011 <sup>5</sup> | Rhode Island, USA                                                                                 | Rhode Island Department of Corrections inmates; interviews with key informants (nurse, doctors) and focus groups with correctional staff | 1343/1364 (98%)                                                                                                                                                                                                                                                                           | Proportion of participants that completed rapid HIV testing among those that were offered a rapid test; also defined as the proportion of participants that accepted and consented to testing, and as acceptance rate | Proportions; no interval estimation |
| Bowles et al., 2008 <sup>6</sup>   | Boston; Chicago; Detroit; Kansas City, Missouri; Los Angeles; San Francisco; and Washington, D.C. | Cohort of adults with unknown serostatus                                                                                                 | 60% [Not all sites systematically collected data on the number of people who declined testing (Detroit and Washington only).]                                                                                                                                                             | Acceptance rate, calculated by dividing the number of people that accepted testing by the total number of people approached for testing during the periods in which refusal data were collected                       | Proportions; no interval estimation |
| Bucher et al., 2007 <sup>7</sup>   | San Francisco, USA                                                                                | Cohort of homeless and marginally housed adults                                                                                          | 95% (95% CI = 88.7–94.7%) agreed to the test when testing occurred at the site of recruitment vs 70.9% (95% CI = 68.3–73.4%) when test was at a nearby site (P<0.0001). Acceptance rate was 87.2% in shelters, 72.9% in meal lines, and 70.5% in single room occupancy hotels (P<0.0001). | Acceptance rate, calculated as the proportion of individuals that agreed to rapid testing                                                                                                                             | Proportions with 95% CI             |
| Burns et al., 2013 <sup>8</sup>    | Central acute medical admissions unit in London, England                                          | Mixed methods study (implementation and survey) with adults (19-95 yrs. old)                                                             | 153/282 (54.3%) agreed to participate in the study. 93.6% (131 of 140) agreed to a test. 97% of participants thought POCT HIV testing was both a good idea and appropriate. 90.1% liked receiving information via video.                                                                  | Proportion of: participants that agreed to participate; participants that thought that the POCT was good idea or appropriate; participants that liked receiving information via video                                 | Proportions; no interval estimation |

|                                            |                                                               |                                                                                                                                  |                                                                                                                                                                                                                                                                                                                         |                                                                                                                                                                                |                                     |
|--------------------------------------------|---------------------------------------------------------------|----------------------------------------------------------------------------------------------------------------------------------|-------------------------------------------------------------------------------------------------------------------------------------------------------------------------------------------------------------------------------------------------------------------------------------------------------------------------|--------------------------------------------------------------------------------------------------------------------------------------------------------------------------------|-------------------------------------|
| Carballo-Diéguez et al., 2012 <sup>9</sup> | New York City, USA                                            | Mixed methods study (diagnostic evaluation and survey) with MSM                                                                  | 101/124 of partners accepted to test                                                                                                                                                                                                                                                                                    | Partner acceptance to home-based test                                                                                                                                          | Proportions; no interval estimation |
| Choko et al., 2011 <sup>10</sup>           | Urban Blantyre, Malawi                                        | Cohort of adult (>=16 yrs.) members of 60 households and 72 members of community peer groups                                     | Self-testing options were ranked second to door-to-door standard VCT by an external provider as being most likely to successfully increase HIV testing in the community. Local distribution of self-test kits by a neighbor without having to disclose results was acceptable to 205 (94.5%) of participants.           | Acceptance of strategy                                                                                                                                                         | Proportions; no interval estimation |
| Cirone et al., 2013 <sup>11</sup>          | Urban level 1 trauma center (presumably at the US)            | Cohort of ED patients (18-64 yrs.); pilot study                                                                                  | 75/80 (95%) accepted HIV rescreening with the rapid HIV test                                                                                                                                                                                                                                                            | Proportion of participants that consented to test                                                                                                                              | Proportions; no interval estimation |
| Crinti et al., 2009 <sup>12</sup>          | Ambulatory obstetrics and gynecology clinic, Philadelphia, PA | Survey with women (18-45 yrs.) at 32 weeks or more of gestation and a documented HIV negative test before 24 weeks of gestation  | 75/80 (95%) accepted HIV rescreening with the rapid HIV test; accepted test because: testing was good for the baby (76%), were encouraged by provider (40%); declined test because: did not perceive themselves at risk (n=3) , tested for HIV recently (n=2) and reported sexual abstinence since first HIV test (n=2) | Proportion of participants that accepted or that declined testing                                                                                                              | Proportions; no interval estimation |
| Darling et al., 2012 <sup>13</sup>         | Red Lights District in Lausanne, Switzerland                  | Survey with clients of FSW (all were men)                                                                                        | n=112, n=127 and n=79 men were interviewed in 2009, 2010 and 2011 respectively, of which n= 30, 64, 37 were agreed to HIV testing but only n=31, 47 and 31 were actually tested (others did not follow through because they found the waiting time unacceptable)                                                        | Proportion of participants that agreed or refused to test                                                                                                                      | Number of individuals               |
| Ekouevi et al., 2012 <sup>14</sup>         | Tokoin Teaching Hospital in Lomé (Togo)                       | Survey with pregnant women                                                                                                       | Acceptance of HIV testing in the labor ward: 91.9% (n=467); among those with antenatal testing record: 90.8% (326/359); among those who tested for the first time in labor ward: 94.6% (141/149) (p=0.15)                                                                                                               | Proportion of participants that accepted testing (acceptance was compared among women who tested for the first time in labor ward and those with records of antenatal testing) | Proportions; no interval estimation |
| Garrard et al., 2010 <sup>15</sup>         | United Kingdom                                                | Implementation study in a cohort of women attending a termination of pregnancy service who were recommended HIV tests as part of | Of the 2831 women attending the service between November 2008 and September 2009, 36.9% (n=1044) had a HIV test documented                                                                                                                                                                                              | Proportion of participants that had a documented HIV test                                                                                                                      | Proportions; no interval estimation |

|                                     |                                                                 |                                                                                                                                                                                                                                               |                                                                                                                                                                                                                                                             |                                                                                                 |                                     |
|-------------------------------------|-----------------------------------------------------------------|-----------------------------------------------------------------------------------------------------------------------------------------------------------------------------------------------------------------------------------------------|-------------------------------------------------------------------------------------------------------------------------------------------------------------------------------------------------------------------------------------------------------------|-------------------------------------------------------------------------------------------------|-------------------------------------|
|                                     |                                                                 | routine consultation                                                                                                                                                                                                                          |                                                                                                                                                                                                                                                             |                                                                                                 |                                     |
| Gaydos et al., 2013 <sup>16</sup>   | Johns Hopkins Hospital ED (Baltimore, USA)                      | Survey with emergency department patients (18–64 yrs. old)                                                                                                                                                                                    | 473/955 (49.5%)                                                                                                                                                                                                                                             | Proportion of participants that consented to participate (among those who were approached)      | Proportions; no interval estimation |
| Gennotte et al., 2013 <sup>17</sup> | 10 medical centers in Belgium                                   | Cohort of patients with an indicator condition, AIDS-defining illness, belonging to a high-prevalence group, having returned from a country with a high HIV prevalence, having had a recent pregnancy or abortion, or with other risk for HIV | 12/217 (6%) refused the standard test because they were not covered by national health insurance or fear of losing anonymity; 13/217 (6%) refused rapid testing because it was too stressful or because they were not ready to receive a result immediately | Proportion of participants that declined to test                                                | Proportions; no interval estimation |
| Herbert et al., 2012 <sup>18</sup>  | Hospital for Tropical Diseases, London, UK                      | Before-after study in a cohort of patients of the open-access emergency clinic                                                                                                                                                                | 44.8% vs.23.6% (p<0.0001)                                                                                                                                                                                                                                   | Acceptance of rapid test (compared to conventional testing)                                     | Proportions; no interval estimation |
| Hooshyar et al., 2014 <sup>19</sup> | Dallas, Fort Worth, and Texoma (Texas, USA)                     | Cohort of homeless veterans attending to an outreach event                                                                                                                                                                                    | 133/910 veterans were tested                                                                                                                                                                                                                                | Proportion of participants that were tested                                                     | Proportions; no interval estimation |
| Jabbari et al., 2011 <sup>20</sup>  | Shahid Rajaie, Lengeh, and Shahid Bahonar ports (south of Iran) | Mixed methods (cohort and survey) study with sailors                                                                                                                                                                                          | 400/409                                                                                                                                                                                                                                                     | Proportion of participants that consented to test of all those that were approached             | Proportions; no interval estimation |
| Jabbari et al., 2011 <sup>21</sup>  | Lavasan (northeast of Tehran, Iran)                             | Surveillance study with immigrant Afghan population (11 years or older) living in Lavasan, Iran                                                                                                                                               | 477/491 (97.1%)                                                                                                                                                                                                                                             | Acceptance rate                                                                                 | Proportions; no interval estimation |
| Kania et al. 2010 <sup>22</sup>     | Bobo-Dioulasso (Burkina Faso, West Africa)                      | Diagnostic evaluated among ARV-naïve pregnant women screened for HIV in order to participate in the PMTCT Kesho Bora trial                                                                                                                    | 44653/51983 (85.9%)                                                                                                                                                                                                                                         | Proportion of participants that accepted to be screened for HIV                                 | Proportions; no interval estimation |
| Levin et al., 2012 <sup>23</sup>    | Cape Town, South Africa                                         | Diagnostic evaluation among caregivers and previously untested children (aged 17–24 months) attending to immunization clinics                                                                                                                 | 499/567 caregivers consented.                                                                                                                                                                                                                               | Proportion of participants that consented to test                                               | Proportions; no interval estimation |
| Macgowan et al., 2009 <sup>24</sup> | Florida, Louisiana, New York, and Wisconsin                     | Implementation study in a cohort of jail inmates                                                                                                                                                                                              | 422/440 (96%)                                                                                                                                                                                                                                               | Proportion of participants with positive rapid test who accepted to take a confirmatory testing | Proportions; no interval estimation |

|                                    |                                                 |                                                                                                                                                                                                                                 |                                                                                                                                                                                                |                                                                                                           |                                     |
|------------------------------------|-------------------------------------------------|---------------------------------------------------------------------------------------------------------------------------------------------------------------------------------------------------------------------------------|------------------------------------------------------------------------------------------------------------------------------------------------------------------------------------------------|-----------------------------------------------------------------------------------------------------------|-------------------------------------|
| Manavi et al., 2012 <sup>25</sup>  | Birmingham Pride event                          | Cohort; authors mention only consenting adults (men)                                                                                                                                                                            | 398/405 (98%)                                                                                                                                                                                  | Proportion of individuals that agreed to be tested; test uptake                                           | Proportions; no interval estimation |
| Martin et al., 2011 <sup>26</sup>  | 24 sites in New Jersey                          | Diagnostic evaluation with clients of health facilities in the rapid testing program                                                                                                                                            | 25/394                                                                                                                                                                                         | Proportion of preliminary positives participants that refused confirmatory WB                             | Proportions; no interval estimation |
| Mathe et al., 2008 <sup>27</sup>   | Rural hospital in North East RDC                | Cohort of pregnant women undergoing counselling for HIV (part of a large study examining the risks of postnatal HIV transmission associated with different modes of infant feeding)                                             | 47/2609 (1.8%) refused to test (among those who refused to test, 1 said she was afraid of the needle, and 3 said they were against testing without giving a specific reason)                   | Proportion of participants that declined testing                                                          | Proportions; no interval estimation |
| Melo et al., 2013 <sup>28</sup>    | Public hospital in Porto Alegre, Brazil         | Mixed methods (cohort + survey) study with pregnant women and their partners                                                                                                                                                    | 1648/2888 (95.3%) women accepted enrollment and 81 (4.7%) refused; 1094 men accepted HIV rapid testing (66.4%) and 554 (33.6%) declined testing; 1648 (57%) women consented to partner testing | Enrollment; proportion of participants that accepted or that declined testing; consent to partner testing | Proportions; no interval estimation |
| Melvin et al., 2004 <sup>29</sup>  | Instituto Materno-Perinatal in Lima, Peru       | Diagnostic evaluation with previously untested pregnant women presenting to the emergency room that were not beyond the first stage of labor                                                                                    | All but one of the women approached for testing consented for the investigation and completed the study protocol                                                                               | Consent to test                                                                                           | Number of Individuals               |
| Menacho et al., 2013 <sup>30</sup> | Primary care centers in Barcelona, Spain        | Mixed methods (cohort + survey) study with adult patients attending to primary care clinics (with an indicator condition (herpes zoster, seborrheic eczema, mononucleosis syndrome and leucopenia/thrombocytopenia) vs. without | Indicator condition cohort: 85/89 (94%); control cohort: 313/344 (90%)                                                                                                                         | Proportion of participants that accepted testing                                                          | Proportions; no interval estimation |
| Mkwanazi et al. 2008 <sup>31</sup> | 8 rural clinics in KwaZulu-Natal (South Africa) | Cohort of pregnant women undergoing counselling for HIV (part of a large study examining the risks of postnatal HIV transmission associated with different modes of infant feeding)                                             | 4810/6444 (74.6%)                                                                                                                                                                              | Proportion of participants that accepted testing                                                          | Proportions; no interval estimation |
| Mullins et al., 2010 <sup>32</sup> | Cincinnati, Ohio                                | Survey with adolescents were recruited from an urban hospital-based adolescent primary care clinic                                                                                                                              | 200/399 (50%)                                                                                                                                                                                  | Proportion of participants that agreed to test                                                            | Proportions; no interval estimation |

|                                         |                                                                                                                                          |                                                                                                                      |                                                                                                                                                                                                                  |                                                                                                                                                                |                                                                |
|-----------------------------------------|------------------------------------------------------------------------------------------------------------------------------------------|----------------------------------------------------------------------------------------------------------------------|------------------------------------------------------------------------------------------------------------------------------------------------------------------------------------------------------------------|----------------------------------------------------------------------------------------------------------------------------------------------------------------|----------------------------------------------------------------|
| Mungrue et al., 2012 <sup>33</sup>      | Queen's Park Counselling Centre and Clinic in Trinidad                                                                                   | Mixed methods (diagnostic evaluation + survey) with all persons seeking HIV testing at the facility                  | 247/297 (83.2%)                                                                                                                                                                                                  | Consent to pre-test counseling                                                                                                                                 | Proportions; no interval estimation                            |
| Ndondoki et al., 2013 <sup>34</sup>     | Abidjan, Côte d'Ivoire                                                                                                                   | Survey with children aged 6–26 weeks attending community clinics and their parents/caregivers                        | 1817 mothers (60.9%; 95%CI: 59.1%–62.6%) accepted their own postpartum HIV test; 35/46 fathers presenting with infant accepted to test (76.1%; 95%CI: 63.8%–88.4%)                                               | Proportion of participants that accepted testing; proportion of infants with formal parental consent among those whose parents accepted early infant diagnosis | Proportions with 95% CI                                        |
| Nelson et al., 2012 <sup>35</sup>       | Lima, Peru                                                                                                                               | Implementation study in a cohort of TB patients                                                                      | 97%                                                                                                                                                                                                              | Proportion of participants that accepted testing                                                                                                               | Number of participants; proportion without interval estimation |
| Newbould et al., 2010 <sup>36</sup>     | London, UK                                                                                                                               | Mixed methods study (cohort and survey) with children over one year of age with HIV positive parents                 | "[Parents all stated that testing their children was highly stressful, and having access to same day results made the process more acceptable." and "The use of POCT was highly acceptable in 100% of families " | Qualitative; proportion of families that considered the use of the POCT acceptable                                                                             | Qualitative; proportion with no interval estimation            |
| Noble et al., 2012 <sup>37</sup>        | N/A                                                                                                                                      | Mixed methods study (cohort + survey) with patients of the emergency department                                      | 57/57 (100%)                                                                                                                                                                                                     | Proportion of participants that accepted testing                                                                                                               | Proportions; no interval estimation                            |
| Ouladlarsen et al., 2012 <sup>38</sup>  | University hospital in Casablanca, Morocco                                                                                               | Implementation study in a cohort of patients of the hospital, including children aged > 18 m with unknown serostatus | 100%                                                                                                                                                                                                             | Acceptance rate                                                                                                                                                | Proportions; no interval estimation                            |
| Pai et al., 2008 <sup>39</sup>          | Department of Obstetrics and Gynecology at the Mahatma Gandhi Institute of Medical Sciences, rural teaching hospital in Sevagram (India) | Mixed methods study (diagnostic evaluation and survey) with women (18–45 y) in active and/or early (incipient) labor | 1222/1252 (98%)                                                                                                                                                                                                  | Proportion of participants that accepted testing                                                                                                               | Proportions; no interval estimation                            |
| Parisi et al., 2013 <sup>40</sup>       | Milan, Italy                                                                                                                             | Cohort of clients of anonymous testing at different testing facilities                                               | 7865/140000 (5.6%)                                                                                                                                                                                               | Proportion of participants that accepted testing and counselling                                                                                               | Proportions; no interval estimation                            |
| Ramachandran et al., 2011 <sup>41</sup> | Tamilnadu, South India                                                                                                                   | Cohort of clients attending integrated counseling and testing centers, excluding antenatal women and children        | 17958 /18329 (98%)                                                                                                                                                                                               | Proportion of participants that accepted testing after counseling                                                                                              | Proportions; no interval estimation                            |
| Robbins et al., 2010 <sup>42</sup>      | Odesa, Kyiv and Donetsk, Ukraine                                                                                                         | Cohort of out-of-school youth (15–24 years) in Odesa, Kyiv and Donetsk living part- or full-time on                  | 929/1043 (97%)                                                                                                                                                                                                   | Participation rate                                                                                                                                             | Proportions; no interval estimation                            |

|                                         |                                                                              |                                                                                                                                                           |                                                                                                                                                                    |                                                                                                                         |                                                                                     |
|-----------------------------------------|------------------------------------------------------------------------------|-----------------------------------------------------------------------------------------------------------------------------------------------------------|--------------------------------------------------------------------------------------------------------------------------------------------------------------------|-------------------------------------------------------------------------------------------------------------------------|-------------------------------------------------------------------------------------|
|                                         |                                                                              | the street                                                                                                                                                |                                                                                                                                                                    |                                                                                                                         |                                                                                     |
| Ruutel et al., 2012 <sup>43</sup>       | Tallinn, Estonia                                                             | Survey with mostly IDUs and MSM (but not exclusively)                                                                                                     | 89.1% participation rate; 41/376 declined testing                                                                                                                  | Participation rate; number of participants that declined testing                                                        | Proportions without interval estimation (participation rate); number of individuals |
| Sattin et al., 2011 <sup>44</sup>       | Georgia and South Carolina counties                                          | Implementation study in a cohort of ED patients aged 13 to 64 years                                                                                       | 8504/ 9343                                                                                                                                                         | Proportion of participants that accepted testing                                                                        | Number of individuals                                                               |
| Scognamiglio et al., 2011 <sup>45</sup> | Rome, Italy                                                                  | Implementation study in a cohort of individuals attending to the mobile unit, usually marginalized people (drug users, sex workers, homeless, immigrants) | 323/1028                                                                                                                                                           | Acceptance rate, defined as the number of participants that refused testing among those who offered a rapid HIV testing | Proportions; no interval estimation                                                 |
| Stenstrom et al., 2013 <sup>46</sup>    | St. Paul's Hospital ED, Vancouver, Canada                                    | Survey with adult (19-75 yrs. old) ED patients                                                                                                            | 1403/2001 (70.1%; 95% CI 68–72)                                                                                                                                    | Proportion of participants that accepted testing                                                                        | Proportions with 95% CI                                                             |
| Tepper et al., 2009 <sup>47</sup>       | 6 prenatal clinics associated with 6 hospitals from 6 major cities in the US | Diagnostic evaluation among women that were at least 34 weeks gestation and were not in labor and HIV status was unknown                                  | 240/266 (90.2%)                                                                                                                                                    | Proportion of participants that accepted to participate                                                                 | Proportions; no interval estimation                                                 |
| Theron et al., 2011 <sup>48</sup>       | Somerset West district of Western Cape Province, South Africa                | RCT in women with unknown serostatus and at least 28 weeks pregnant being admitted for delivery                                                           | 199/ 542 declined; 343/542 women (63.3%) accepted                                                                                                                  | Number of participants that declined testing; proportion of participants that accepted enrollment and rapid HIV testing | Number of participants; proportions without interval estimation                     |
| van Rooyen et al., 2013 <sup>49</sup>   | Rural KwaZulu-Natal, South Africa                                            | Cohort of adults                                                                                                                                          | 671/739 (91%) consented and were tested; 51/739 (7%) declined                                                                                                      | Proportion of participants that consented or that declined participation                                                | Proportions; no interval estimation                                                 |
| Veloso et al., 2010 <sup>50</sup>       | Public maternity hospitals in Rio de Janeiro and Porto Alegre, Brazil        | Diagnostic evaluation; women with unknown HIV serostatus admitted for delivery and infants from HIV-positive mothers                                      | Among pregnant women with unknown HIV serostatus at delivery, 3.3% in Rio de Janeiro (4,347) and 0.3% in Porto Alegre (1,794) refused to participate in this study | Proportion of participants that declined testing                                                                        | Proportions; no interval estimation                                                 |
| Viani et al., 2013 <sup>51</sup>        | Tijuana General Hospital in Baja California, Mexico                          | Diagnostic evaluation with pregnant women                                                                                                                 | 1,383/1,464 (94%) of women in labor/delivery and 1,992/2,075 (96%) of women in prenatal care                                                                       | Proportion of participants that accepted testing                                                                        | Proportions; no interval estimation                                                 |
| White et al., 2009 <sup>52</sup>        | Urban ED in Oakland, California                                              | Cohort of medically stable patients (>= 12 years-old)                                                                                                     | 18.3%                                                                                                                                                              | Proportion of age-eligible patient visits in which HIV screening was offered and accepted                               | Number of participants; proportion without interval estimation                      |

|                                     |            |                                                                  |                 |                                                 |                                     |
|-------------------------------------|------------|------------------------------------------------------------------|-----------------|-------------------------------------------------|-------------------------------------|
| Young et al.,<br>2013 <sup>53</sup> | Mozambique | Implementation study with a<br>cohort of antenatal care patients | 83/20646 (0.4%) | Proportion of participants that refused testing | Proportions; no interval estimation |
|-------------------------------------|------------|------------------------------------------------------------------|-----------------|-------------------------------------------------|-------------------------------------|

**Table1b** : Included studies on feasibility measures.

| Study                              | Setting                                                                         | Study design and population                                                                                                     | Outcome                                                                                                                                                                                                                                                                                                                                                                                                                                        | Definitions used by the authors                                                                                                                                                                                                                                                                                                                                                                          | Reporting                           |
|------------------------------------|---------------------------------------------------------------------------------|---------------------------------------------------------------------------------------------------------------------------------|------------------------------------------------------------------------------------------------------------------------------------------------------------------------------------------------------------------------------------------------------------------------------------------------------------------------------------------------------------------------------------------------------------------------------------------------|----------------------------------------------------------------------------------------------------------------------------------------------------------------------------------------------------------------------------------------------------------------------------------------------------------------------------------------------------------------------------------------------------------|-------------------------------------|
| Becker et al., 2013 <sup>54</sup>  | Health Sciences Centre Hospital (Winnipeg, Manitoba, Canada)                    | Mixed methods study (diagnostic evaluation and survey) with adults in an ED                                                     | 96% reported satisfaction with the test and 93% believed it belonged in the ED. 95.5% of participants were confident of the accuracy of the test                                                                                                                                                                                                                                                                                               | Proportion of patients who reported satisfaction with the test or who believed the test belonged in the ED; participants that were confident of the accuracy of the test                                                                                                                                                                                                                                 | Proportions; no interval estimation |
| Beckwith et al., 2011 <sup>5</sup> | Rhode Island Department of Corrections jail, USA                                | Pilot study with incarcerated inmates; interviews with key informants (nurse, doctors) and focus groups with correctional staff | "Key informant interview and focus group participants overwhelmingly reported positive experiences and opinions about rapid HIV testing at the correctional facility and preferred the rapid testing model to the conventional testing program in place on other days of the week. Benefits were identified at the staff, system, and inmate levels and were frequently related to the use of oral specimens in place of standard phlebotomy." | Improvement in patient cooperation                                                                                                                                                                                                                                                                                                                                                                       | Qualitative                         |
| Burns et al., 2013 <sup>8</sup>    | Central acute medical admissions unit in London, England                        | Mixed methods study (implementation and survey) with adults (19–95 yrs. old)                                                    | No staff felt that the service had disrupted their job, and all felt that the service should be continued. 92% of doctors believed that more of their own patients were now tested for HIV, and no doctors felt that the service made them less likely to offer a test, with three-quarters believing that the service increased the likelihood of them requesting an HIV test either directly or via the service.                             | Proportion of the staff that felt that the service had disrupted their job or felt that the service should be continued; proportion of doctors who believe the strategy increased the number of their patients who got tested                                                                                                                                                                            | Proportions; no interval estimation |
| Castel et al., 2012 <sup>55</sup>  | Washington, DC (United States)                                                  | Mixed methods (cohort + focus group) with adults testing at outreach events                                                     | 47% had documented referrals for HIV care and treatment services; quick turnaround times for POCT were mentioned in focus groups, but no actual measurement was performed                                                                                                                                                                                                                                                                      | Proportion of participants who had documented referrals to HIV treatment and care services among those who screened positive for HIV<br><br>"Participants identified the ease of rapid testing and quick turnaround for obtaining results as incentives for testing. Participants also felt that HIV testing should be a part of any medical examination, similar to getting one's vital signs checked." | Proportions; no interval estimation |
| Conners et al., 2012 <sup>56</sup> | 3 different Veterans Health Administration SUD (substance use disorder) clinics | Mixed methods study (survey and implementation) in a cohort of individuals with substance use disorders                         | "Facilitators included the ease of NRT integration into workflow, engaged management and an existing culture of disease prevention." and "Findings indicate that NRT can be successfully incorporated into some types of SUD subclinics with minimal                                                                                                                                                                                           | Ease of nurse-initiated rapid test integration into workflow as a facilitator for the implementation of a nurse-initiated testing strategy                                                                                                                                                                                                                                                               | Qualitative                         |

|                                    |                                                        |                                                                                                                                                |                                                                                                                                                                                                                                                             |                                                                                                                                                                                                                                                                                                               |                                                                                                  |
|------------------------------------|--------------------------------------------------------|------------------------------------------------------------------------------------------------------------------------------------------------|-------------------------------------------------------------------------------------------------------------------------------------------------------------------------------------------------------------------------------------------------------------|---------------------------------------------------------------------------------------------------------------------------------------------------------------------------------------------------------------------------------------------------------------------------------------------------------------|--------------------------------------------------------------------------------------------------|
|                                    | across the USA                                         |                                                                                                                                                | perceived impact on workflow and time."                                                                                                                                                                                                                     |                                                                                                                                                                                                                                                                                                               |                                                                                                  |
| Gaydos et al., 2013 <sup>16</sup>  | Johns Hopkins Hospital ED (Baltimore, USA)             | Survey with ED patients (18–64 years)                                                                                                          | 467/473 patients completed the test. 99.8% reported that “overall” the self-test was “easy or somewhat easy” to perform; 96.9% reported they would “probably” or “definitely” test themselves at home if the rapid HIV test were available OTC for purchase | Completion rate; proportion of participants who reported that the self-test was “easy or somewhat easy” to perform                                                                                                                                                                                            | Proportions; no interval estimation                                                              |
| Gunter et al., 2008 <sup>57</sup>  | Hassle Free Clinic in Toronto, Canada                  | Cohort of clinic attendees                                                                                                                     | Scores values: rapid testers would choose the same type of test in the future = 4.78; rapid testers believe test result = 4.66                                                                                                                              | "Standard testers indicated significantly greater difficulty than rapid testers with the testing procedure. Test counselors also indicated that standard testers had greater difficulty"<br><br>How participants with negative results responded to the question: "I believe that the test result is correct" | Qualitative<br><br>Mean Likert score (on scale from 1 = strongly disagree to 5 = strongly agree) |
| Manavi et al., 2012 <sup>25</sup>  | Birmingham Pride event                                 | Cohort of consenting male adults                                                                                                               | 0.79                                                                                                                                                                                                                                                        | Tests per staff-hour carried out                                                                                                                                                                                                                                                                              | Number of tests                                                                                  |
| Menacho et al., 2013 <sup>30</sup> | Primary care centers in Barcelona, Spain               | Mixed methods (survey and cohort); pilot study with adult patients attending to primary care clinics (with an indicator condition vs. without) | Completion of the test: with an indicator condition: 85/85 (100%); controls: 304/313 (97%). Offer rate: 11.5% in the group with indicator condition vs. 5.2% in the control group.                                                                          | Completion Rate Proportion of those who were offered the test over the total eligible patients                                                                                                                                                                                                                | Proportions; no interval estimation                                                              |
| Mungrue et al., 2012 <sup>33</sup> | Queen’s Park Counselling Centre and Clinic in Trinidad | Mixed methods (diagnostic evaluation + survey) with all persons seeking HIV testing from 2008 at the facility                                  | A friend (127, 51.4%); from the media (72, 29.1%); health care providers (12, 4.8%) were the least common source of information about rapid testing.                                                                                                        | How people became aware of rapid testing, defined as the method by which the participants became aware of the existence of rapid testing as a proportion of the total number of participants                                                                                                                  | Proportions; no interval estimation                                                              |
| Nelson et al., 2012 <sup>35</sup>  | Lima, Peru                                             | Implementation study in a cohort of TB patients                                                                                                | Health care worker had 1.95 ± 1.62 encounter per patient; 29.7% deferred testing during first encounter of which 93.3% were successfully tested during a follow up visit                                                                                    | Clinical encounters that health care workers had per patient<br><br>Proportion of patients who were successfully tested after having deferred testing in the first encounter                                                                                                                                  | Mean ± SD<br><br>Proportions; no interval estimation                                             |
| Noble et al., 2012 <sup>37</sup>   | N/A                                                    | Mixed methods study (survey of a cohort of patients of the ED)                                                                                 | “There has been no identifiable negative impact on the ED”                                                                                                                                                                                                  | Impact on the ED routine                                                                                                                                                                                                                                                                                      | Qualitative                                                                                      |
| Nóbrega et al., 2013 <sup>58</sup> | Salvador, Brazil                                       | Cohort of pregnant women admitted for delivery at a maternity hospital                                                                         | 13/28 women (46%) received any antiretroviral regimen during pregnancy                                                                                                                                                                                      | Number of infected women that received antiretroviral therapy during prenatal care                                                                                                                                                                                                                            | Proportions; no interval estimation                                                              |

|                                        |                                                                              |                                                                                                                           |                                                                                                                                                                                                                                                                                                                            |                                                                                                                                                                                           |                                                                                                                                                                                                        |
|----------------------------------------|------------------------------------------------------------------------------|---------------------------------------------------------------------------------------------------------------------------|----------------------------------------------------------------------------------------------------------------------------------------------------------------------------------------------------------------------------------------------------------------------------------------------------------------------------|-------------------------------------------------------------------------------------------------------------------------------------------------------------------------------------------|--------------------------------------------------------------------------------------------------------------------------------------------------------------------------------------------------------|
| Ouladlarsen et al., 2012 <sup>38</sup> | University hospital in Casablanca, Morocco                                   | Implementation study in a cohort of patients of the hospital, including children aged > 18 months with unknown serostatus | Annual demand for rapid tests increased from 181 to 540 tests; 19% of the demand came from external clinics; most tests were ordered by doctors from the infectious diseases department (46.8%), followed by reanimation services (18.5%), pneumology (11.8%) and gastroenterology (9.8%)                                  | Which medical specialists ordered HIV tests                                                                                                                                               | Proportions; no interval estimation                                                                                                                                                                    |
| Russell et al., 2007 <sup>59</sup>     | Chuuk State, Micronesia                                                      | Survey with residents of remote outer islands (pilot study)                                                               | 357/370 (96%) of individuals tested returned for post-test counseling                                                                                                                                                                                                                                                      | Proportion of individuals tested who returned for post-test counselling                                                                                                                   | Proportions; no interval estimation                                                                                                                                                                    |
| Seewald et al., 2013 <sup>60</sup>     | Hospital-based methadone program in New York City                            | Retrospective before-after (before: routine testing; after: targeted testing) study in a cohort of opioid users           | Before phase: 1121/7875 (14%) of the patients were tested; after phase: 2700/7870 of the patients (34%) were tested.<br><br>Before phase: 438/1559 tests (28%) were duplicates (i.e. the same individuals were identified and tested two or more times in the same year); after phase: 110/2810 tests (4%) were duplicates | Proportion of patients tested with each strategy                                                                                                                                          | Proportions; no interval estimation                                                                                                                                                                    |
| Stenstrom et al., 2013 <sup>46</sup>   | St. Paul's Hospital ED, Vancouver, Canada                                    | Survey with adult (19-75 yrs. old) ED patients                                                                            | 7.2 minutes (IQR = 4.7–10.1 min)                                                                                                                                                                                                                                                                                           | Time required to perform each test                                                                                                                                                        | Median with interquartile ranges                                                                                                                                                                       |
| Tepper et al., 2009 <sup>47</sup>      | 6 prenatal clinics associated with 6 hospitals from 6 major cities in the US | Diagnostic evaluation among women that were at least 34 weeks gestation and were not in labor and HIV status was unknown  | Time between sample collection and result = 25 minutes (range: 20-110 minutes) vs. 23h (range: 3.5h-45 days) for laboratory-based; 273 (96%) were available within 1 hour. Median test duration: point-of-care = 24 minutes vs laboratory-based testing (35 minutes; $P < .0001$ )                                         | Three different metrics related to TAT: proportion of tests results available within one hour, test duration, and time between sample collection                                          | Proportion of tests available without interval estimation. Test duration: median without range. Time between sample collection: estimate with ranges (unclear whether median or average time was used) |
| Thomas et al., 2011 <sup>61</sup>      | Not Given                                                                    | Mixed methods study (cohort and survey) with MSM                                                                          | "93% reported they were more likely to undergo repeat screening because of rapid testing. 2% were found to be HIV positive. Of these, 60% cited the rapid test as the primary reason for undergoing screening".                                                                                                            | Proportion of participants who said that they were willing to screen repeatedly because of rapid testing; how likely participants would undergo repeat screening because of rapid testing | Proportions; no interval estimation                                                                                                                                                                    |
| Veloso et al., 2010 <sup>50</sup>      | Public maternity hospitals in Rio de Janeiro and Porto Alegre, Brazil        | Diagnostic evaluation; women with unknown HIV serostatus admitted for delivery and infants from HIV-positive mothers      | 48% of women in the study were tested during labor and 51.8% in the postpartum period                                                                                                                                                                                                                                      | Percentage of women tested during labor or in the postpartum period (denominator unclear)                                                                                                 | Proportions; no interval estimation                                                                                                                                                                    |

|                                 |                                 |                                                        |                                                                                                                                                                                                                                                                                                                  |                                                                                                                                                                                                                                                                                                                                                                                                                                                             |                                     |
|---------------------------------|---------------------------------|--------------------------------------------------------|------------------------------------------------------------------------------------------------------------------------------------------------------------------------------------------------------------------------------------------------------------------------------------------------------------------|-------------------------------------------------------------------------------------------------------------------------------------------------------------------------------------------------------------------------------------------------------------------------------------------------------------------------------------------------------------------------------------------------------------------------------------------------------------|-------------------------------------|
| White et al, 2009 <sup>52</sup> | Urban ED in Oakland, California | Cohort of medically stable patients above 12 years-old | "HIV screening was offered during 45,159 (38.2%) (...) and completed in 7,923 (6.7%) of the 118,324 ED visits. (...) HIV screening was accepted by patients in 47.9% of the visits in which it was offered, and screening tests were performed in 36.6% of the visits during which patients accepted screening." | <p>Test completion rate per patient visit in the emergency department. Authors also reported another completion rate that was defined similarly as in our framework (of all visits during which patients accepted screening, in how many the test procedure was completed).</p> <p>Proportion of visits in which HIV screening was offered and accepted by eligible patients.</p> <p>Proportion of patient visits during which HIV testing was offered.</p> | Proportions; no interval estimation |
|---------------------------------|---------------------------------|--------------------------------------------------------|------------------------------------------------------------------------------------------------------------------------------------------------------------------------------------------------------------------------------------------------------------------------------------------------------------------|-------------------------------------------------------------------------------------------------------------------------------------------------------------------------------------------------------------------------------------------------------------------------------------------------------------------------------------------------------------------------------------------------------------------------------------------------------------|-------------------------------------|

**Table 1c.** Included studies reporting preference measures.

| Study                              | Setting                                       | Study design and population                                                                                                                  | Outcome                                                                                                                                                                                                                                                                  | Definition of acceptability used by the authors                                                                                     | Reporting                          |
|------------------------------------|-----------------------------------------------|----------------------------------------------------------------------------------------------------------------------------------------------|--------------------------------------------------------------------------------------------------------------------------------------------------------------------------------------------------------------------------------------------------------------------------|-------------------------------------------------------------------------------------------------------------------------------------|------------------------------------|
| Choko et al., 2011 <sup>10</sup>   | Urban Blantyre, Malawi                        | Cohort of adult (>= 16 yrs.) members of 60 households and 72 members of community peer groups                                                | 260 (91.9%) participants who consented to VCT opted to self-test; the other 23 (8.1%) choose not to self-test. Self-testing at home was the preferred option for future HIV tests for 61.1%.                                                                             | Proportion of participants who consented to voluntary counselling and testing that also opted to self-test (reported as preference) | Proportion; no interval estimation |
| Guenther et al, 2008 <sup>57</sup> | Hassle Free Clinic in Toronto, Canada         | Cohort of clinic attendees                                                                                                                   | 1468/1610 (91%) of participants chose the rapid POC test (versus 8.8% for the standard HIV testing). Among patients with negative test, standard testers were less satisfied overall. 91% of standard testers would choose the same test again vs. 97% of rapid testers. | Proportion of participants who chose the POCT (reported as "quality of experience")                                                 | Proportion; no interval estimation |
| Keller et al., 2011 <sup>62</sup>  | Two public STI clinics in Baltimore, Maryland | Cohort of clinic attendees                                                                                                                   | 2265/5101 (44%) participants chose the point-of-care test                                                                                                                                                                                                                | Proportion of participants who chose the POCT                                                                                       | Proportion; no interval estimation |
| Marsh et al., 2010 <sup>63</sup>   | Mobile Clinic in Long Beach, CA, USA          | Survey with clients of a mobile testing unit at methadone clinics, substance abuse treatment centers, and a gay and lesbian community center | 917/2752 (33%)                                                                                                                                                                                                                                                           | Number of rapid tests over the number of total tests performed in a mobile clinic                                                   | Proportion; no interval estimation |
| Mullins et al, 2010 <sup>32</sup>  | Cincinnati, Ohio                              | Survey with adolescents recruited at an urban hospital-based adolescent primary care clinic                                                  | 70% of participants chose a rapid testing method. 50.5% chose the rapid oral fluid test, 30.3% the traditional venipuncture test, and 19.2% the rapid finger stick blood test.                                                                                           | Proportion of participants who chose the POCT                                                                                       | Proportion; no interval estimation |
| Nelson et al., 2012 <sup>35</sup>  | Lima, Peru                                    | Implementation study in a cohort of TB patients                                                                                              | Preference for testing site: 54 (58.7%) in their health establishment, 31 (33.7%) at home, 3 (3.3%) in a park, and 4 (4.4%) were tested in another location (i.e., place of work or public place)                                                                        | Preference for testing site                                                                                                         | Proportion; no interval estimation |
| Ruutel et al., 2012 <sup>43</sup>  | Tallinn, Estonia                              | Survey with mostly MSM and IDUs                                                                                                              | 42.6% preferred fingerpick, 24.2% whole blood draw in a clinical setting, 2.4% saliva rapid testing, 24.9% stated no preference, and 5.9% did not know.                                                                                                                  | Preference for the HIV test                                                                                                         | Proportion; no interval estimation |

**Table 1d.** Included studies reporting measures of disease frequency.

| Study                               | Setting                                                            | Study design and population                                                                                             | Outcome                                                                                                                                                                                                                                                                                                                                    | Definition used by the authors                                                               | Reporting                                 | Measure classification according to the framework |
|-------------------------------------|--------------------------------------------------------------------|-------------------------------------------------------------------------------------------------------------------------|--------------------------------------------------------------------------------------------------------------------------------------------------------------------------------------------------------------------------------------------------------------------------------------------------------------------------------------------|----------------------------------------------------------------------------------------------|-------------------------------------------|---------------------------------------------------|
| Anaya et al., 2010 <sup>3</sup>     | 9 shelters of the Los Angeles Homeless Services Authority          | Randomized controlled trial with homeless veterans using the shelters                                                   | 1.50%                                                                                                                                                                                                                                                                                                                                      | HIV prevalence and rate of new incidence                                                     | Percentage; no interval estimation        | Period prevalence                                 |
| Benzaken et al., 2011 <sup>64</sup> | 9 Special Indigenous Health Districts in the Amazon region, Brazil | Cohort of sexually active individuals                                                                                   | 3 (0.1%)                                                                                                                                                                                                                                                                                                                                   | Positive HIV tests                                                                           | Number of individuals who tested positive | Period prevalence                                 |
| Bucher et al., 2007 <sup>7</sup>    | San Francisco, USA                                                 | Cohort of homeless and marginally housed adults                                                                         | Seroprevalence was 9.4% (95% CI 7.2–11.5%)                                                                                                                                                                                                                                                                                                 | Seroprevalence                                                                               | Percentage with 95% CI                    | Period prevalence                                 |
| Choko et al., 2011 <sup>10</sup>    | Urban Blantyre, Malawi                                             | Cohort of adult (>= 16 yrs.) members of 60 households and 72 members of community peer groups                           | 18.5% (48 of 260)                                                                                                                                                                                                                                                                                                                          | HIV prevalence                                                                               | Proportion; no interval estimation        | Period prevalence                                 |
| Ekouevi et al., 2012 <sup>14</sup>  | Tokoin Teaching Hospital in Lomé (Togo)                            | Survey with pregnant women                                                                                              | 41/467 (8.8%, 95% CI: 6.4–11.2%)                                                                                                                                                                                                                                                                                                           | Prevalence                                                                                   | Proportion with 95% CI                    | Period prevalence                                 |
| Ganesan et al., 2010 <sup>65</sup>  | N/A                                                                | Diagnostic evaluation with FSW, MSM, and IDUs                                                                           | Overall: 3.69% (22/594). FSW: 3.67% (15/408); MSM: 2.95% (4/136); IDU: 6% (3/50).                                                                                                                                                                                                                                                          | Samples positive for HIV antibodies                                                          | Percentage; no interval estimation        | Period prevalence                                 |
| Gennotte et al., 2013 <sup>17</sup> | 10 medical centers in Belgium                                      | Cohort of patients with an indicator condition, AIDS-defining illness, or with a characteristic indicating risk for HIV | Seroprevalence: 0 – 0.5% (1/185) in medical centers that delivered care to a ‘mixed’ population; 5.5% (1/18) in the center that delivered care to patients originating mainly from sub-Saharan Africa. Seroprevalence according to ethnic origin: 0% among Caucasian; 2.2% among Africans; 1.5% among patients with an indicator condition | Seroprevalence                                                                               | Proportion; no interval estimation        | Period prevalence                                 |
| Guenther et al., 2008 <sup>57</sup> | Hassle Free Clinic in Toronto, Canada                              | Cohort of clinic attendees                                                                                              | HIV prevalence of 2.82% for standard testers and 1.23% for rapid testers (relative risk [RR] 2.3, 95% confidence                                                                                                                                                                                                                           | HIV prevalence; HIV prevalence by type of test (POCT vs. conventional) and the relative risk | Percentage; no interval estimation        | Period prevalence                                 |

|                                     |                                                                  |                                                                                                                                                                                     |                                                                                 |                                                                                                 |                                              |                   |
|-------------------------------------|------------------------------------------------------------------|-------------------------------------------------------------------------------------------------------------------------------------------------------------------------------------|---------------------------------------------------------------------------------|-------------------------------------------------------------------------------------------------|----------------------------------------------|-------------------|
|                                     |                                                                  |                                                                                                                                                                                     | interval [CI] 0.82–6.4).                                                        | with 95% CI                                                                                     |                                              |                   |
| Herbert et al., 2012 <sup>18</sup>  | Hospital for Tropical Diseases, London, UK                       | Before-after study in a cohort of patients of the open-access emergency clinic                                                                                                      | "Almost 1%, with 3 patients from Sub-Saharan Africa and 1 patient from the U.K" | Prevalence of hitherto undiagnosed HIV                                                          | Proportion; no interval estimation           | Period prevalence |
| Hoyos et al., 2012 <sup>66</sup>    | University campuses in Madrid, Málaga and Salamanca (Spain)      | Mixed methods study (cohort and survey), supposedly with university students (not specified in the paper)                                                                           | 0.24% (95% CI 0.07–0.62); MSM = 1.6% (95% CI 0.43–3.95)                         | Global prevalence                                                                               | Percentage with 95% CI                       | Period prevalence |
| Jabbari et al., 2011 <sup>20</sup>  | Shahid Rajaie, Lengeh, and Shahid Bahaonar ports (south of Iran) | Mixed methods (cohort and survey) study with sailors                                                                                                                                | 1/400 (0.25%, 95% CI 0.006%–1.38%)                                              | Study prevalence                                                                                | Proportion with 95% CI                       | Period prevalence |
| Jabbari et al., 2011 <sup>21</sup>  | Lavasan (northeast of Tehran, Iran)                              | Surveillance study with immigrant Afghan population (11 years or older) living in Lavasan, Iran                                                                                     | 0.2% (95% CI 0.005–1.2)                                                         | Prevalence                                                                                      | Percentage with 95% CI                       | Period prevalence |
| Jerene et al, 2007 <sup>67</sup>    | Arba Minch Hospital in Ethiopia                                  | Adult tuberculosis patients                                                                                                                                                         | 20.6% (14/68)                                                                   | HIV prevalence rate                                                                             | Proportion; no interval estimation           | Period prevalence |
| Kania et.al 2010 <sup>22</sup>      | Bobo-Dioulasso (Burkina Faso, West Africa)                       | Diagnostic evaluated among ARV-naïve pregnant women screened for HIV in order to participate in the PMTCT Kesho Bora trial                                                          | 1.3% (597/44653; 95% CI 1.2 to 1.4)                                             | Prevalence rates of indeterminate and positive serological HIV results                          | Proportion with 95% CI                       | Seroprevalence    |
| Levin et al., 2012 <sup>23</sup>    | Cape Town, South Africa                                          | Diagnostic evaluation among caregivers and previously untested children (aged 17–24 months) attending to immunization clinics                                                       | mothers: 21% (107/499)                                                          | HIV prevalence (also prevalence of reported HIV exposure) and transmission rate (6-week period) | Proportion (prevalence); rate (transmission) | Period prevalence |
| Macgowan et al., 2009 <sup>24</sup> | Florida, Louisiana, New York, and Wisconsin                      | Implementation study in a cohort of jail inmates                                                                                                                                    | 1.3% (440/33,221); 5.0% among never tested                                      | Reactive rapid HIV tests; prevalence among previously tested and those who had never tested     | Proportion; no interval estimation           | Period prevalence |
| Manavi et al., 2012 <sup>25</sup>   | Birmingham Pride event                                           | Cohort; authors mention only consenting adults (men)                                                                                                                                | 37.7                                                                            | Incidence                                                                                       | Number of cases per 10000/day                | Incidence         |
| Mathe et al., 2008 <sup>27</sup>    | Rural hospital in North East RDC                                 | Cohort of pregnant women undergoing counselling for HIV (part of a large study examining the risks of postnatal HIV transmission associated with different modes of infant feeding) | 1.9% (CI 95 = 1.5–2.5); 9.8% observed with the rapid test                       | HIV prevalence and seroprevalence used interchangeably                                          | Proportion with 95% CI                       | Seroprevalence    |

|                                          |                                                        |                                                                                                                                                                                                    |                                                                                                                                         |                                                                                                                                                                                                                                           |                                                            |                              |
|------------------------------------------|--------------------------------------------------------|----------------------------------------------------------------------------------------------------------------------------------------------------------------------------------------------------|-----------------------------------------------------------------------------------------------------------------------------------------|-------------------------------------------------------------------------------------------------------------------------------------------------------------------------------------------------------------------------------------------|------------------------------------------------------------|------------------------------|
| Melo et al., 2013 <sup>28</sup>          | Public hospital in Porto Alegre, Brazil                | Mixed methods (cohort + survey) study with pregnant women and their partners                                                                                                                       | "7/1094 previously untested men were identified as HIV+ (prevalence, 0.6%; 95% CI, 0.3%–1.3%)"                                          | Prevalence                                                                                                                                                                                                                                | Proportion with 95% CI                                     | Period prevalence            |
| Menacho et al., 2013 <sup>30</sup>       | Primary care centers in Barcelona, Spain               | Mixed methods (cohort + survey) study with adult patients attending to primary care clinics with an indicator condition (herpes zoster, seborrheic eczema, mononucleosis syndrome, and leucopenia) | Indicator condition group: 4.7% (95% CI 1.3–11.6)<br>Control (n = 304): 0.3% (95% CI 0.01%–1.82%)                                       | Prevalence                                                                                                                                                                                                                                | Proportion with 95% CI                                     | Period prevalence            |
| Mikolasova et al., 2013 <sup>68</sup>    | Hospital in Bunda, Tanzania                            | Cohort of hospital patients from in- and outpatient units                                                                                                                                          | 3–4% prevalence, even among sick patients; after July 2011, monthly prevalence was 10–15 cases/1000–1200 patients (1–1.5%)              | Prevalence; incidence (incidence of new cases and monthly prevalence used interchangeably)                                                                                                                                                | Number of cases/number of patients; no interval estimation | Period prevalence; incidence |
| Morin et al., 2006 <sup>69</sup>         | 12 marketplaces in Epworth and Seke, Zimbabwe          | Mixed methods study (cohort and survey) with adults (18 yrs. or older)                                                                                                                             | 321/1099 (29.2%)                                                                                                                        | Seroprevalence                                                                                                                                                                                                                            | Proportion; no interval estimation                         | Period prevalence            |
| Mungrue et al., 2012 <sup>33</sup>       | Queen's Park Counselling Centre and Clinic in Trinidad | Mixed methods (diagnostic evaluation + survey) with all persons seeking HIV testing from 2008 at the facility                                                                                      | 43.7 per 10,000 population in 2009 and 54.6 per 10,000 in 2010; highest seropositivity rate (18.2%) among 20-24 and over 51 yrs. (18.2) | Testing prevalence rate (defined as the number of adults who actually received an HIV rapid test for the two calendar years of complete data); proportion of HIV detected by rapid testing; number of positive tests; seropositivity rate | Proportions; no interval estimation                        | Period prevalence            |
| Mwembo-Tambwe et al., 2013 <sup>70</sup> | Lubumbashi, D.R. Congo                                 | Cohort of pregnant women in labor rooms                                                                                                                                                            | 21/433 (4.8% IC 95% 3.1%–7.4%); 3.1 % among 15–24 yrs.-old                                                                              | Prevalence                                                                                                                                                                                                                                | Proportion with 95% CI                                     | Period prevalence            |
| Ndondoki et al., 2013 <sup>34</sup>      | Abidjan, Côte d'Ivoire                                 | Survey with children aged 6–26 weeks attending community clinics and their parents/caregivers                                                                                                      | Five of the 42 tested infants were infected (11.9%; 95% CI 2.1%–21.7%)                                                                  | HIV-infected mothers among those who accepted to test                                                                                                                                                                                     | Percentage with 95% CI                                     | Period prevalence            |
| Nóbrega et al., 2013 <sup>58</sup>       | Salvador, Brazil                                       | Cohort of pregnant women admitted for delivery at a maternity hospital                                                                                                                             | 0.8% (28/3300)                                                                                                                          | Prevalence and seroprevalence used interchangeably                                                                                                                                                                                        | Proportion; no interval estimation                         | Seroprevalence               |

|                                         |                                                                                                                                          |                                                                                                                         |                                                                                                                        |                                                                                                                                                                |                                    |                                    |
|-----------------------------------------|------------------------------------------------------------------------------------------------------------------------------------------|-------------------------------------------------------------------------------------------------------------------------|------------------------------------------------------------------------------------------------------------------------|----------------------------------------------------------------------------------------------------------------------------------------------------------------|------------------------------------|------------------------------------|
| Pai et al., 2008 <sup>39</sup>          | Department of Obstetrics and Gynecology at the Mahatma Gandhi Institute of Medical Sciences, rural teaching hospital in Sevagram (India) | Mixed methods study (diagnostic evaluation and survey) with women (18–45 yrs.) in active and/or early (incipient) labor | 1.23% (95% CI 0.61%–1.8%)                                                                                              | Seroprevalence                                                                                                                                                 | Proportion with 95% CI             | Seroprevalence                     |
| Parisi et al, 2013 <sup>40</sup>        | Milan, Italy                                                                                                                             | Cohort of adults unaware of their serostatus                                                                            | 50/7865 (0.63%)                                                                                                        | Oral test reactive                                                                                                                                             | Proportion; no interval estimation | Period prevalence                  |
| Portman et al., 2013 <sup>71</sup>      | Northern England (UK HIV Testing week)                                                                                                   | General public cohort                                                                                                   | 2/94 (2.1%)                                                                                                            | Positivity rate / reactive tests                                                                                                                               | Proportion; no interval estimation | Period prevalence                  |
| Qvist et al., 2014 <sup>72</sup>        | Copenhagen, Denmark                                                                                                                      | Cohort of MSM                                                                                                           | 1% of all rapid tests performed; 11% of all new cases among MSM in Copenhagen; 15/539 (3%) positive tests in 2011-2012 | Proportion of positive tests over all tests done; proportion of new cases detected with POCT over all new cases in that specific population; HIV-positive rate | Proportion; no interval estimation | Period prevalence                  |
| Ramachandran et al., 2011 <sup>41</sup> | Tamilnadu, South India                                                                                                                   | Cohort of clients attending integrated counseling and testing centers, excluding antenatal women and children           | "overall HIV seroprevalence was 4.1% (varied from 2.6 to 6.2% in different districts)"                                 | Seroprevalence                                                                                                                                                 | Percentage; no interval estimation | Seroprevalence                     |
| Robbins et al., 2010 <sup>42</sup>      | Odesa, Kyiv and Donetsk, Ukraine                                                                                                         | Cohort of out-of-school youth (15–24 years) living part- or full-time on the street                                     | "Overall HIV seroprevalence was 18.4% (95% CI: 16.2 – 20.2) "                                                          | Seroprevalence                                                                                                                                                 | Percentage with 95% CI             | Seroprevalence / period prevalence |
| Ruutel et al., 2012 <sup>43</sup>       | Tallinn, Estonia                                                                                                                         | Survey with mostly IDUs and MSM (but not exclusively)                                                                   | 58/308                                                                                                                 | Preliminary positive cases identified                                                                                                                          | Proportion; no interval estimation | Period prevalence                  |
| Theron et al., 2011 <sup>48</sup>       | Somerset West district of Western Cape Province, South Africa                                                                            | Cluster randomized trial in women with unknown serostatus and at least 28 weeks pregnant being admitted for delivery    | "13.1% (45/343) 95% CI (9.7–17.2)"                                                                                     | Seroprevalence and prevalence used interchangeably                                                                                                             | Percentage with 95% CI             | Seroprevalence                     |
| van Rooyen et al., 2013 <sup>49</sup>   | Rural KwaZulu-Natal, South Africa                                                                                                        | Cohort of adults                                                                                                        | 30%                                                                                                                    | Proportion of individuals who tested positive                                                                                                                  | Percentage; no interval estimation | Period prevalence                  |
| Veloso et al., 2010 <sup>50</sup>       | Public maternity hospitals in Rio de Janeiro and Porto Alegre, Brazil                                                                    | Diagnostic evaluation; women with unknown HIV serostatus admitted for delivery and infants from HIV-positive mothers    | Porto Alegre = 6.5% (N=1,439); Rio de Janeiro = 1.3% (N=3,778)                                                         | Prevalence                                                                                                                                                     | Proportion; no interval estimation | Seroprevalence                     |

|                                  |                                                     |                                                               |                                                                                                                                                 |                                                                                             |                                             |                |
|----------------------------------|-----------------------------------------------------|---------------------------------------------------------------|-------------------------------------------------------------------------------------------------------------------------------------------------|---------------------------------------------------------------------------------------------|---------------------------------------------|----------------|
| Viani et al., 2013 <sup>51</sup> | Tijuana General Hospital in Baja California, Mexico | Diagnostic evaluation with pregnant women                     | Tested during labor and delivery: (19/1,383, 1.37%, 95% CI 0.85%–2.18%; during prenatal care: (5/1992, 0.25%, 95% CI 0.09%–0.62%)               | Seroprevalence among women tested during labor/delivery or during prenatal care; prevalence | Proportion with 95% CI                      | Seroprevalence |
| Young et al., 2013 <sup>53</sup> | Mozambique                                          | Implementation study with a cohort of antenatal care patients | “Routine PMTCT results was 13.5% (IQR 7.0-21.4%); site-level prevalence estimates calculated from surveillance data was 14.4% (IQR 8.2-21.8%).” | Prevalence                                                                                  | Percentage with IQR (site-level prevalence) | N/A            |

**Table 1e.** Included studies reporting impact measures.

| Study                               | Setting                                                                                                                                               | Study design and population                                                                                                | Outcome Reported                                                                                                                                                                                                    | Definitions used by the authors                                                                                                                                                                                        | Reporting                                                                  |
|-------------------------------------|-------------------------------------------------------------------------------------------------------------------------------------------------------|----------------------------------------------------------------------------------------------------------------------------|---------------------------------------------------------------------------------------------------------------------------------------------------------------------------------------------------------------------|------------------------------------------------------------------------------------------------------------------------------------------------------------------------------------------------------------------------|----------------------------------------------------------------------------|
| Anaya et al., 2010 <sup>1</sup>     | 9 shelters of the Los Angeles Homeless Services Authority                                                                                             | Randomized controlled trial with homeless veterans using the shelters                                                      | "Testing rates were 100.0% in rapid testing (RT) arm and 3.3% in referral arm (P < .0001). Test result receipt rates were 98.5% in RT arm and 0.0% in Referral arm (P < .0001)"                                     | Testing rate (proportion of participants tested in each arm); increase in testing not calculated<br><br>Number of results received (documented in both arms: rapid testing and referral to conventional testing)       | Proportion; no interval estimation                                         |
| Anaya, 2008 <sup>73</sup>           | 2 Veteran Affairs Health Care Sites in Southern California; one was a hospital and other was outpatient clinic serving indigent and homeless veterans | Randomized controlled trial evaluating three models of HIV testing among adults (between 18–65 yrs.) unaware of HIV status | Individuals in model A (RR= 2.06 95% CI= 1.1-3.7) were less likely to receive results than in C (RR=5.2; 95%CI = 3.1–8.9) or B (RR=2.25; 95% CI = 1.82–3.58)                                                        | Likelihood of receiving test result<br><br>A=traditional HIV counseling/testing;<br><br>B= Nurse-initiated screening +traditional counseling/testing;<br><br>C= Nurse-initiated + streamlined counseling/rapid testing | Relative risk with confidence intervals                                    |
| Ashby et al., 2010 <sup>3</sup>     | United Kingdom                                                                                                                                        | Survey with patients of a polyclinic serving a highly migrant urban population                                             | 27/71 (38%) of those tested had at least 1 identifiable risk factors and of those, 17/27 (63%) had never tested; no new diagnoses of HIV were made.                                                                 | Number of tests performed on participants with at least one identifiable risk factor for HIV<br><br>Number of participants never tested before; number of new diagnosis                                                | Proportion; no interval estimation<br><br>Number (no new cases were found) |
| Batey et al., 2012 <sup>4</sup>     | Alabama, USA                                                                                                                                          | Interviews with individuals presenting to a Level I trauma and academic medical center in Alabama                          | No new positives detected                                                                                                                                                                                           | Number of new positives                                                                                                                                                                                                | Number (no positives were found)                                           |
| Beckwith et al., 2010 <sup>74</sup> | Rhode Island Department of Corrections central jail facility                                                                                          | Cohort of incarcerated males                                                                                               | 28% (30/108) of those who completed the follow-up visit received results from their standard HIV test conducted with no significant difference between the rapid (31%) and standard testing (26%) groups (P = 0.29) | Number of results received                                                                                                                                                                                             | Proportion; no interval estimation                                         |
| Beckwith et al., 2011 <sup>5</sup>  | Rhode Island, USA                                                                                                                                     | Rhode Island Department of Corrections inmates; interviews with key informants (nurse, doctors) and focus groups with      | 12 (0.8%) rapid HIV tests with oral specimens were reactive; 1 new diagnose. 8 disclosed HIV-positive status after rapid testing; 3 with chronic HIV infection did not disclose.                                    | Number of reactive tests; number of new diagnosis; number of positive results disclosed by the participants                                                                                                            | Proportion without interval estimation; number;                            |

|                                            |                                                                                                   |                                                                              |                                                                                                                                                                                                                                                                                                                                  |                                                                                                                                                                                                                                                                                  |                                                                                                   |
|--------------------------------------------|---------------------------------------------------------------------------------------------------|------------------------------------------------------------------------------|----------------------------------------------------------------------------------------------------------------------------------------------------------------------------------------------------------------------------------------------------------------------------------------------------------------------------------|----------------------------------------------------------------------------------------------------------------------------------------------------------------------------------------------------------------------------------------------------------------------------------|---------------------------------------------------------------------------------------------------|
|                                            |                                                                                                   | correctional staff                                                           | No new positives detected.                                                                                                                                                                                                                                                                                                       |                                                                                                                                                                                                                                                                                  | number                                                                                            |
| Benzaken et al., 2011 <sup>64</sup>        | 9 Special Indigenous Health Districts in the Amazon region, Brazil                                | Cohort of sexually active individuals                                        | 38799/83311 (47%)                                                                                                                                                                                                                                                                                                                | Test uptake (defined as the proportion of participants tested for HIV)                                                                                                                                                                                                           | Proportion; no interval estimation                                                                |
| Bowles et al., 2008 <sup>6</sup>           | Boston; Chicago; Detroit; Kansas City, Missouri; Los Angeles; San Francisco; and Washington, D.C. | Cohort of adults with unknown serostatus                                     | 331/23900 (1.4%) received preliminary positive HIV test results; 267/23900 (1.1%; range 0.5% to 1.8%) newly diagnosed HIV infections. 75% received their confirmatory test results. 30% of participants had never been tested for HIV, and of those who had, 43% had not been tested in the past year. 64% were referred to care | Number of preliminary results received; proportion of positives who received confirmatory results; number of newly diagnosed infections; number of first time testers; number of participants not tested in the past year; proportion of participants referred to care           | Proportion; no interval estimation; proportion with range; proportion with no interval estimation |
| Bucher et al., 2007 <sup>7</sup>           | San Francisco, USA                                                                                | Cohort of homeless and marginally housed adults                              | 30 newly diagnosed cases with confirmatory results, of whom 26 (86.7%; 95% CI 69.3–96.2) reported at least one contact with a primary healthcare provider in the 6 months following diagnosis; 174/1213 (14.3%) had never been tested before. 7/37 newly diagnosed were lost to follow up                                        | Number of positive tests with confirmatory results; number of participants reporting at least one contact with a HCP in 6 months following diagnosis<br><br>Loss to follow-up                                                                                                    | Number<br><br>Proportion with 95% CI; proportion with no interval estimation                      |
| Burns et al., 2013 <sup>8</sup>            | Central acute medical admissions unit in London, England                                          | Mixed methods study (implementation and survey) with adults (19-95 yrs. old) | 3/135 tests (2.2%) were reactive on POCT and all were confirmed by laboratory testing. All three patients were seen by specialist HIV services while in-patients and remained engaged with HIV services 12 months on. Only one of the three had previously been tested for HIV, over 5 years previously.                         | Reactive tests; confirmed reactivity;<br><br>Number of participants with positive tests who have been previously tested during the last 5 years; number of patients who were seen by specialist in HIV services; number of patients who remained engaged in care after 12 months | Proportion; no interval estimation<br><br>Number                                                  |
| Carballo-Diéguez et al., 2012 <sup>9</sup> | New York City, USA                                                                                | Mixed methods study (diagnostic evaluation and survey) with MSM              | "Lack of partner resistance to taking the test was seen as a good sign. When partners resisted, participants often interpreted it as a warning not to have sex with that person."                                                                                                                                                | Partner resistance to test when offered the home-based test as reported by the participants                                                                                                                                                                                      | Qualitative                                                                                       |
| Choko et al., 2011 <sup>10</sup>           | Urban Blantyre, Malawi                                                                            | Cohort of adult (>=16 y) members of 60 households and 72 members of          | After self-testing, all participants would recommend self-testing to friends and                                                                                                                                                                                                                                                 | Proportion of participants that would recommend self-testing to others                                                                                                                                                                                                           | Proportion; no interval                                                                           |

|                                    |                                                               |                                                                                                                                                   |                                                                                                                                                                                                                                                                                                                                                    |                                                                                                                               |                                                                                                  |
|------------------------------------|---------------------------------------------------------------|---------------------------------------------------------------------------------------------------------------------------------------------------|----------------------------------------------------------------------------------------------------------------------------------------------------------------------------------------------------------------------------------------------------------------------------------------------------------------------------------------------------|-------------------------------------------------------------------------------------------------------------------------------|--------------------------------------------------------------------------------------------------|
|                                    |                                                               | community peer groups                                                                                                                             | family                                                                                                                                                                                                                                                                                                                                             |                                                                                                                               | estimation                                                                                       |
| Cirone et al., 2013 <sup>11</sup>  | Urban level 1 trauma center (presumably at the US)            | Cohort of ED patients (18-64 yrs.); pilot study                                                                                                   | <p>None of the tests were reactive</p> <p>50% of the patients had not previously received an HIV test.</p> <p>Average test time: 24.5 minutes</p>                                                                                                                                                                                                  | <p>Number of negative tests</p> <p>Number of patients previously untested</p> <p>Test time</p>                                | <p>Number</p> <p>Proportion; no interval estimation</p> <p>Average; no measure of dispersion</p> |
| Criniti et al., 2009 <sup>12</sup> | Ambulatory obstetrics and gynecology clinic, Philadelphia, PA | Survey with women (18-45 yrs.) at 32 weeks or more of gestation and a documented HIV negative test before 24 weeks of gestation                   | No new cases                                                                                                                                                                                                                                                                                                                                       | Number of new cases                                                                                                           | Number (no new cases were found)                                                                 |
| Darling et al., 2012 <sup>13</sup> | Red Lights District in Lausanne, Switzerland                  | Survey with clients of FSW (all were men)                                                                                                         | No reactive test; 52–71% had never undergone an HIV test                                                                                                                                                                                                                                                                                           | Number of reactive tests; number of participants who ever tested before                                                       | Number (none of the tests was reactive); Proportion with no interval estimation                  |
| Ekouevi et al., 2012 <sup>14</sup> | Tokoin Teaching Hospital in Lomé (Togo)                       | Survey with pregnant women                                                                                                                        | <p>14/41 (34.1%) women living with HIV were newly diagnosed in labor room; 41.5% (n=17) of the 41 women living with HIV had not initiated any PMTCT intervention antenatal.</p> <p>"Among the 41 women diagnosed as living with HIV during labour, 34% (14 women) had not been tested for HIV during pregnancy and were missed opportunities."</p> | Newly diagnosed individuals; number of PMTCT initiated; missed opportunities (women who had not been tested during pregnancy) | Proportion; no interval estimation                                                               |
| Garrard et al., 2010 <sup>15</sup> | United Kingdom                                                | Implementation study in a cohort of women attending a termination of pregnancy service were recommended HIV tests as part of routine consultation | "Of those where results were available, 0.52% (5/972) were newly diagnosed HIV positives"                                                                                                                                                                                                                                                          | Number of newly diagnosed individuals out of those with results available                                                     | Proportion; no interval estimation                                                               |

|                                      |                                                                                                                            |                                                                                                                         |                                                                                                                                                                                                                                                                                            |                                                                                                                                                                                                                                                           |                                                     |
|--------------------------------------|----------------------------------------------------------------------------------------------------------------------------|-------------------------------------------------------------------------------------------------------------------------|--------------------------------------------------------------------------------------------------------------------------------------------------------------------------------------------------------------------------------------------------------------------------------------------|-----------------------------------------------------------------------------------------------------------------------------------------------------------------------------------------------------------------------------------------------------------|-----------------------------------------------------|
| Guenter et al, 2008 <sup>57</sup>    | Hassle Free Clinic in Toronto, Canada                                                                                      | Cohort of clinic attendees                                                                                              | "Among the rapid testers, 100% received an initial result, and 18 of 22 testing positive returned for confirmatory results."                                                                                                                                                               | Number of results received<br><br>Number of preliminary positive results                                                                                                                                                                                  | Proportion;<br>no interval estimation               |
| Herbert et al., 2012 <sup>18</sup>   | Hospital for Tropical Diseases, London, UK                                                                                 | Implementation study in a cohort of patients of the open-access emergency clinic                                        | "Testing rates increased; with 6.8% tested in the pre-universal testing period, to 44.8% in the universal POCT period (p <0.0001)";<br><br>"No new HIV positive patients were identified in the pre-screening period, 2 with laboratory screening and 2 with POCT (laboratory confirmed)." | Testing rate (proportion of participants tested with or without POCT); increase in testing not calculated<br><br>Number of newly diagnosed patients identified in the pre-screening period, with laboratory screening or with POCT (laboratory confirmed) | Proportion;<br>no interval estimation<br><br>Number |
| Hernandez et al., 2013 <sup>75</sup> | Urban Level-1 Trauma Center                                                                                                | Adult patients who had STD testing at the Emergency Department                                                          | 2.3 hours in the patients receiving an HIV test, compared to 2.6 hours in the non-tested patients (p = 0.42)                                                                                                                                                                               | Length of stay in the Emergency Department                                                                                                                                                                                                                | Median<br>time with p-<br>statistic                 |
| Hooshyar et al., 2014 <sup>19</sup>  | Dallas, Fort Worth, and Texoma (Texas, USA)                                                                                | Cohort of homeless veterans attending to an outreach event                                                              | 92% of the tested veterans obtained their test results at the events (all negative)                                                                                                                                                                                                        | Number of participants that received their results at the testing event                                                                                                                                                                                   | Proportion;<br>no interval estimation               |
| Hoyos et al., 2012 <sup>66</sup>     | University campuses in Madrid, Malaga and Salamanca (Spain)                                                                | Not specified, but appears to be university students (cohort)                                                           | 78,4% tested for the first time; 5/1668 reactive tests (4 confirmed new cases);                                                                                                                                                                                                            | Number of first time testers; number of reactive tests                                                                                                                                                                                                    | Proportion;<br>no interval estimation               |
| Hoyos et al., 2013 <sup>76</sup>     | Spain (Madrid City, two working-class suburbs of Madrid, three coastal cities in the southeast, and in the Canary Islands) | Mixed methods study (cohort and survey) with MSM, men who have sex with women, and women born in Spain or Latin-America | 2455/5920 (40%) had never undergone an HIV test before                                                                                                                                                                                                                                     | Number of first time testers                                                                                                                                                                                                                              | Proportion;<br>no interval estimation               |
| Jabbari et al., 2011 <sup>21</sup>   | Lavasan (northeast of Tehran, Iran)                                                                                        | Surveillance study with immigrant Afghan population (11 years or older) living in Lavasan, Iran                         | 1 positive result confirmed as positive; 5 indeterminate results                                                                                                                                                                                                                           | Number of positive results confirmed by a second tests; number of indeterminate test results                                                                                                                                                              | Numbers                                             |
| Keller et al., 2011 <sup>62</sup>    | Two public STI clinics in Baltimore, Maryland                                                                              | Cohort of clinic attendees                                                                                              | "34 truly newly diagnosed patients, 16 used POC testing"<br><br>27 (47%) engaged in care                                                                                                                                                                                                   | Number of "truly" newly diagnosed individuals with HIV<br><br>Number of participants engaging in care, defined as 2 clinic visits for HIV care after post-test counselling within 6 months of initial positive test result                                | Number<br><br>Proportion;<br>no interval estimation |

|                                     |                                             |                                                                                                                                |                                                                                                                                                                                                                                                                                                                                                                  |                                                                                                                                                                                                                                         |                                                                                  |
|-------------------------------------|---------------------------------------------|--------------------------------------------------------------------------------------------------------------------------------|------------------------------------------------------------------------------------------------------------------------------------------------------------------------------------------------------------------------------------------------------------------------------------------------------------------------------------------------------------------|-----------------------------------------------------------------------------------------------------------------------------------------------------------------------------------------------------------------------------------------|----------------------------------------------------------------------------------|
| Levin et al., 2012 <sup>23</sup>    | Cape Town, South Africa                     | Diagnostic evaluation among caregivers and previously untested children (aged 17–24 months) attending to immunization clinics  | No previously unknown HIV infection was detected                                                                                                                                                                                                                                                                                                                 | Number of previously unknown infections                                                                                                                                                                                                 | Number (no previously unknown infections were found)                             |
| Macgowan et al., 2009 <sup>24</sup> | Florida, Louisiana, New York, and Wisconsin | Implementation study in a cohort of jail inmates                                                                               | >99.9% received test results. 269 (0.8%) confirmed new diagnoses (1.3% HIV+ with rapid tests; 5.0% with rapid tests among never tested); newly diagnosed represented 64% of those with reactive tests.                                                                                                                                                           | Number of results received<br><br>Proportion of confirmed new diagnosis overall results; number of new diagnosis with rapid tests                                                                                                       | Number<br><br>Proportion; no interval estimation                                 |
| Manavi et al., 2012 <sup>25</sup>   | Birmingham Pride event                      | Cohort; authors mention only consenting adults (men)                                                                           | 6/405 (1.5%) were diagnosed with HIV infection; only 1 was already aware of his HIV status                                                                                                                                                                                                                                                                       | Number of HIV diagnosis; number of individuals that were already aware of their positive serostatus                                                                                                                                     | Proportion without interval estimation; number                                   |
| Martin et al., 2011 <sup>26</sup>   | 24 sites in New Jersey                      | Diagnostic evaluation with clients of health facilities in the rapid testing program                                           | "99.95% of all screened clients were resolved by the end of the initial screening visit. Only the 32 discordants (0.062%) required additional testing and delays before reaching a final result and being potentially linked to care."<br><br>289/394 (73.3%) positives by rapid testing had appointments made with a healthcare provider during the first visit | Number of patients screened and "resolved" by the end of the initial screening visit; number of test discordants requiring further testing<br><br>Number of rapid test positives who had appointments with a HCP during the first visit | Proportion; no interval estimation                                               |
| Mayhood et al., 2008 <sup>77</sup>  | Northern Tanzania                           | Mixed methods study (diagnostic and cost evaluation) with clients of the KIWA KKUKI clinic (Women Against AIDS in Kilimanjaro) | "1,938/12,737 (15.2%) were concordant positive; 10,736/12,73 (84.3%) were concordant negative; 63/12,73 (0.5%) discordant rapid HIV test results                                                                                                                                                                                                                 | Number of positive or negative concordant results; number of discordant results                                                                                                                                                         | Proportions; no interval estimation                                              |
| Mehta et al., 2008 <sup>78</sup>    | Boston, USA                                 | Cohorts of patients                                                                                                            | "Among 16,750 HIV tests, 258 (1.5%) were positive. Thus, 229 (1.37%; 95% confidence interval [CI] 1.20, 1.56) of 16,696 patients were newly diagnosed with HIV"<br><br>"Of the 258 patients who tested HIV positive, 29 reported a previous HIV-positive test result in their pretest                                                                            | Number of positive results; number of newly diagnosed individuals<br><br>Number of patients with a previous HIV-positive test result in their pretest counseling assessment                                                             | Proportions (95% confidence intervals provided for newly diagnosed participants) |

|                                       |                                                                                                  |                                                                                                                                              |                                                                                                                                                                                                                                                                                                                                                                                           |                                                                                                                                                                                                               |                                                                                         |
|---------------------------------------|--------------------------------------------------------------------------------------------------|----------------------------------------------------------------------------------------------------------------------------------------------|-------------------------------------------------------------------------------------------------------------------------------------------------------------------------------------------------------------------------------------------------------------------------------------------------------------------------------------------------------------------------------------------|---------------------------------------------------------------------------------------------------------------------------------------------------------------------------------------------------------------|-----------------------------------------------------------------------------------------|
|                                       |                                                                                                  |                                                                                                                                              | counseling assessment"                                                                                                                                                                                                                                                                                                                                                                    |                                                                                                                                                                                                               | Number                                                                                  |
| Melo et al., 2013 <sup>28</sup>       | Public hospital in Porto Alegre, Brazil                                                          | Mixed methods (cohort + survey) study with pregnant women and their partners                                                                 | 4/2888 new infections among women; uncovered 14/1101 serodiscordant couples                                                                                                                                                                                                                                                                                                               | Number of new infections; number of serodiscordant couples uncovered                                                                                                                                          | Number                                                                                  |
| Melvin et al., 2004 <sup>29</sup>     | Instituto Materno-Perinatal in Lima, Peru                                                        | Diagnostic evaluation with previously untested pregnant women presenting to the emergency room that were not beyond the first stage of labor | 80.7% previously untested. Number treated unclear (21/23 treated reported in the results; 11/12 of women tested during labor and 7/10 of women tested earlier reported as treated in the discussion<br><br>25 women tested HIV seropositive by both rapid tests, but 2/25 (8%) failed to confirm HIV-1 or -2 seropositivity by EIA                                                        | Number of previously untested participants; Number treated (different proportions of participants treated given throughout the paper)<br><br>Number of participants with positive results in both rapid tests | Proportion; no interval estimation<br><br>Number                                        |
| Metsch et al., 2012 <sup>79</sup>     | Community treatment programs for drug or alcohol abuse in several sites across the United States | Randomized controlled trial with HIV-negative (or unknown status) adults who reported no past-year HIV testing                               | "Participants randomized to on-site rapid testing were significantly more likely to complete and receive the results of an HIV test compared with participants randomized to the off-site referral arm (P < .001; aRR = 4.52; 97.5% confidence interval [CI] = 3.57, 5.72)"; "Offering HIV rapid testing on site in drug treatment centers increased receipt of test results and uptake." | Likelihood of receiving test result; number of reactive results received; likelihood of complete testing procedure (POCT compared to conventional testing)                                                    | Adjusted relative risk with confidence intervals; number of reactive results            |
| Mikolasova et al., 2013 <sup>68</sup> | Hospital in Bunda, Tanzania                                                                      | Cohort of hospital patients from in- and outpatient units                                                                                    | 194 new cases of HIV were detected (in 2005–2010) and 226 (19%) of these patients receive antiretroviral therapy (ARV): 20 new treated cases/month and 240 new treated cases/year                                                                                                                                                                                                         | Number of new cases detected<br><br>Number of new cases that received ART                                                                                                                                     | Number<br><br>Proportion without interval estimation; number of cases per month or year |

|                                     |                                                        |                                                                                                                                                                                     |                                                                                                                                                                                                                                                                                                                                                                                                                                                                                                                                                                              |                                                                                                                                                                                                                                                                                      |                                                                                                      |
|-------------------------------------|--------------------------------------------------------|-------------------------------------------------------------------------------------------------------------------------------------------------------------------------------------|------------------------------------------------------------------------------------------------------------------------------------------------------------------------------------------------------------------------------------------------------------------------------------------------------------------------------------------------------------------------------------------------------------------------------------------------------------------------------------------------------------------------------------------------------------------------------|--------------------------------------------------------------------------------------------------------------------------------------------------------------------------------------------------------------------------------------------------------------------------------------|------------------------------------------------------------------------------------------------------|
| Mkwanazi et al. 2008 <sup>31</sup>  | 8 rural clinics in KwaZulu-Natal (South Africa)        | Cohort of pregnant women undergoing counselling for HIV (part of a large study examining the risks of postnatal HIV transmission associated with different modes of infant feeding) | Women were more likely to return for results before rapid tests were introduced than after: 65% (2800/4321) vs. 50% (2321/4368), with declining trend over time for returning for results: those testing in 2002 (OR 0.61; 95% CI 0.46–0.81), 2003 (OR 0.23; 95% CI 0.18–0.31; p < 0.001) and 2004 (OR 0.32; 95% CI 0.24–0.42) were less likely to return for results compared to those testing in 2001                                                                                                                                                                      | Likelihood of receiving test result by introduction of rapid test and by year                                                                                                                                                                                                        | Proportion without confidence intervals<br><br>Odds ratio with confidence intervals                  |
| Mullins et al., 2010 <sup>32</sup>  | Cincinnati, Ohio                                       | Survey with adolescents were recruited from an urban hospital-based adolescent primary care clinic                                                                                  | 22/40 (55%)                                                                                                                                                                                                                                                                                                                                                                                                                                                                                                                                                                  | Number of testers who returned for results (some participants preferred to come back on another day to pick up their results, even though they were tested with a POCT)                                                                                                              | Proportion; no interval estimation                                                                   |
| Mungrue et al., 2012 <sup>33</sup>  | Queen's Park Counselling Centre and Clinic in Trinidad | Mixed methods (diagnostic evaluation + survey) with all persons seeking HIV testing from 2008 at the facility                                                                       | "The prevalence of HIV testing among [adults] (...) who actually received an HIV rapid test for the two calendar years of complete data (ie, 2009 and 2010) was 43.7 per 10,000 population in 2009 and 54.6 per 10,000 in 2010". Also report "proportion of HIV detected by rapid testing" by gender without confidence intervals. Highest seropositivity rate (18.2%) among 20-24 and over 51 yrs (18.2%). No overall prevalence reported."<br><br>"Over the study period, the number of persons who received rapid tests increased"<br><br>45 positive tests, 44 confirmed | Prevalence of HIV testing; increase in the number of tests performed; increase in the number of participants who received their results<br><br>Increase in the number of participants who received their results<br><br>Number of positive tests; number of positive tests confirmed | Number of tests; number of tests per 10000 population per year<br><br><br>Qualitative;<br><br>Number |
| Ndondoki et al., 2013 <sup>34</sup> | Abidjan, Côte d'Ivoire                                 | Survey with children aged 6–26 weeks attending community clinics and their parents/caregivers                                                                                       | 81 mothers were identified as HIV infected (4.5%; 95% CI 3.5%–5.4%); 54 new cases detected. 2 fathers were HIV+ (5.7%; 95% CI 0–13.4%).                                                                                                                                                                                                                                                                                                                                                                                                                                      | Number of mothers identified as infected; number of new cases detected; number of fathers infected                                                                                                                                                                                   | Proportions with 95% CI; number of new cases                                                         |
| Nelson et al., 2012 <sup>35</sup>   | Lima, Peru                                             | Implementation study in a cohort of TB patients                                                                                                                                     | "All results were communicated to the health provider of total participants, including 100% among HIV-positive patients."                                                                                                                                                                                                                                                                                                                                                                                                                                                    | Number of test results received when rapid test was offered (results received by testing site and compared to conventional testing)                                                                                                                                                  | Proportion; no interval estimation                                                                   |

|                                        |                                                                                                                                                  |                                                                                                                           |                                                                                                                                                                                                                                                                                                                                                                                                                                                                                                                                                                                                                                                                                                                                          |                                                                                                                                                                                                                                                                                                                                                                                                                                                 |                                                                                                                                                                                                                                                             |
|----------------------------------------|--------------------------------------------------------------------------------------------------------------------------------------------------|---------------------------------------------------------------------------------------------------------------------------|------------------------------------------------------------------------------------------------------------------------------------------------------------------------------------------------------------------------------------------------------------------------------------------------------------------------------------------------------------------------------------------------------------------------------------------------------------------------------------------------------------------------------------------------------------------------------------------------------------------------------------------------------------------------------------------------------------------------------------------|-------------------------------------------------------------------------------------------------------------------------------------------------------------------------------------------------------------------------------------------------------------------------------------------------------------------------------------------------------------------------------------------------------------------------------------------------|-------------------------------------------------------------------------------------------------------------------------------------------------------------------------------------------------------------------------------------------------------------|
| Noble et al., 2012 <sup>37</sup>       | N/A                                                                                                                                              | Mixed methods study (cohort + survey) with patients of the emergency department                                           | 5/57 (8.8%) tests were reactive; all confirmed                                                                                                                                                                                                                                                                                                                                                                                                                                                                                                                                                                                                                                                                                           | Number of reactive tests with confirmed results                                                                                                                                                                                                                                                                                                                                                                                                 | Proportion; no interval estimation                                                                                                                                                                                                                          |
| Ouladlarsen et al., 2012 <sup>38</sup> | University hospital in Casablanca, Morocco                                                                                                       | Implementation study in a cohort of patients of the hospital, including children aged > 18 months with unknown serostatus | 180/1105 (16.3%) positives, of which 98.9% confirmed by WB. Rapid tests allowed change of treatment for 12 cases of dyspneic pneumopathy and 7 of brain abscess that were being treated as pneumocyst and toxoplasmosis, respectively; 100% HIV+ were linked to care with average CD4 = 280-320 cells/uL                                                                                                                                                                                                                                                                                                                                                                                                                                 | Number of positive tests; proportion of confirmed tests over initial positives<br><br>Treatment change in response to test result<br><br>Number of participants linked to care                                                                                                                                                                                                                                                                  | Proportion; no interval estimation<br><br>Number<br><br>Proportion; no interval estimation                                                                                                                                                                  |
| Pai et al., 2008 <sup>39</sup>         | Department of Obstetrics and Gynecology at the Mahatma Gandhi Institute of Medical Sciences (MGIMS), rural teaching hospital in Sevagram (India) | Mixed methods study (diagnostic evaluation and survey) with women (18–45 y) in active and/or early (incipient) labor      | 659/1222 participants (54%) were never tested before during their pregnancy. 1003/1222 women 1003 (82%; 95% CI 79.8%–84.2%) had never been HIV tested, or had been tested but were unaware of their HIV status.<br><br>11/15 HIV infected (73.3%; 95% CI 47.5%–90.9%) women were newly diagnosed at point-of-care and 14/15 (93.3%; 95% CI 71.3%–99.7%) received PMTCT interventions.<br><br>Time between eligibility assessment and informed consent = 5–10 min; time for pretest counseling = 15 min, and time for rapid testing = 20 min.<br><br>Total time to referral for PMTCT intervention = 40–60 min.<br><br>75% (12/15) HIV+ women discussed their serostatus with their husbands and the remainder (3/15) with their mothers. | Number of women never tested before during pregnancy; never tested or tested but unaware of serostatus<br><br>Number of participants with new infections<br><br>Number of participants who received interventions<br><br>Time for pretest counselling; time taken to perform the test; total time to referral to PMCT intervention<br><br>Proportion of infected women who discussed their serostatus with their partners or with their mothers | Proportion (only never treated or tested but unaware with 95% CI)<br><br>Proportion with 95% CI<br><br>Proportion with 95% CI<br><br>Unclear if median or average; total time to referral was reported with range<br><br>Proportion; no interval estimation |
| Parisi et al., 2013 <sup>40</sup>      | Milan, Italy                                                                                                                                     | Cohort of clients of anonymous testing at different testing facilities                                                    | 0.6% in total with a positive test; 50 new infections; 48% had never undergone an HIV screening test                                                                                                                                                                                                                                                                                                                                                                                                                                                                                                                                                                                                                                     | Number of subjects with positive saliva test<br><br>Number of new infections<br><br>Number of participants who had previously tested                                                                                                                                                                                                                                                                                                            | proportion without interval estimation; Number; proportion                                                                                                                                                                                                  |

|                                     |                                                                                                                            |                                                                                                                                         |                                                                                                                                                                                                                                                                                                                                                                                                                                                                             |                                                                                                                                                                                                                                                                      |                                                                                                                                                              |
|-------------------------------------|----------------------------------------------------------------------------------------------------------------------------|-----------------------------------------------------------------------------------------------------------------------------------------|-----------------------------------------------------------------------------------------------------------------------------------------------------------------------------------------------------------------------------------------------------------------------------------------------------------------------------------------------------------------------------------------------------------------------------------------------------------------------------|----------------------------------------------------------------------------------------------------------------------------------------------------------------------------------------------------------------------------------------------------------------------|--------------------------------------------------------------------------------------------------------------------------------------------------------------|
|                                     |                                                                                                                            |                                                                                                                                         |                                                                                                                                                                                                                                                                                                                                                                                                                                                                             |                                                                                                                                                                                                                                                                      | without interval estimation;                                                                                                                                 |
| Puro et al., 2004 <sup>80</sup>     | St Anna University of Ferrara (hospital A) and the University Hospital of Perugia (hospital B), public hospitals in Italy. | Cohort of patients that were a source of HCW occupational exposure to HIV                                                               | Reduction of HCWs who were given unnecessary PEP (84 to none in one hospital; 93 to none in another)                                                                                                                                                                                                                                                                                                                                                                        | Decrease in unnecessary PEP (post exposure prophylaxis)                                                                                                                                                                                                              | Number and difference after POCT use                                                                                                                         |
| Qvist et al., 2014 <sup>72</sup>    | Copenhagen, Denmark                                                                                                        | Cohort of MSM                                                                                                                           | Before phase: 3/1121 patients (0.27%; 95% CI 0.13–0.52) were newly diagnosed with HIV; all 3 received rapid test results, but only 1/3 received confirmatory result and 0/3 adhered to first HIV medical appointment. After phase: 2700/7870 patients (34%) were tested; 8/2700 (0.29%) were newly diagnosed with HIV. All 8 received confirmatory blood test result; 5/8 adhered to first HIV medical appointment. 63% of 1510 tests performed (in 2011-2012) were retests | <p>Number of newly diagnosed individuals</p> <p>Newly diagnosed individuals who received confirmatory results</p> <p>Number tested for the first time at the mobile clinic; number of retests</p> <p>Number of patients who adhered to first medical appointment</p> | <p>Proportions with 95% CI</p> <p>Proportion; no interval estimation</p> <p>Proportion; no interval estimation</p> <p>Proportion; no interval estimation</p> |
| Robbins et al., 2010 <sup>42</sup>  | Odesa, Kyiv and Donetsk, Ukraine                                                                                           | Cohort of out-of-school youth (15–24 years) in Odesa, Kyiv and Donetsk living part- or full-time on the street                          | 85%                                                                                                                                                                                                                                                                                                                                                                                                                                                                         | Participants with positive results who did not reported a previous HIV diagnosis                                                                                                                                                                                     | Proportion; no interval estimation                                                                                                                           |
| Ruutel et al., 2012 <sup>43</sup>   | Tallinn, Estonia                                                                                                           | Survey with mostly IDUs and MSM (but not exclusively)                                                                                   | 58 received a positive test result during this study (46 were new cases, 30 reported no previous HIV test)                                                                                                                                                                                                                                                                                                                                                                  | Number of positive results; number of new cases; number of participants who reported no previous test                                                                                                                                                                | Number                                                                                                                                                       |
| Sattin et al., 2011 <sup>44</sup>   | Georgia and South Carolina counties                                                                                        | Implementation study in a cohort of ED patients aged 13 to 64 years                                                                     | 41 reactive tests (35 confirmed positive). Nearly 75% of patients confirmed as HIV positive kept their first HIV clinic appointment.                                                                                                                                                                                                                                                                                                                                        | <p>Number of reactive tests; number of confirmed results</p> <p>Number of participants with positive tests who kept their first clinic appointment</p>                                                                                                               | <p>Number</p> <p>Proportion; no interval estimation</p>                                                                                                      |
| Schulden et al., 2008 <sup>81</sup> | Miami Beach, Florida, New York City, and San Francisco                                                                     | Survey with self-identified transgender who were at least 13 years of age and who were not known to be infected with HIV were recruited | 67 (12%) newly diagnosed                                                                                                                                                                                                                                                                                                                                                                                                                                                    | Number of newly diagnosed individuals                                                                                                                                                                                                                                | Proportion; no interval estimation                                                                                                                           |

|                                         |                                                                              |                                                                                                                                                           |                                                                                                                                                                                                                                                                                                                                                                                                                                                                                  |                                                                                                                                                                                                                                      |                                                                                                                                         |
|-----------------------------------------|------------------------------------------------------------------------------|-----------------------------------------------------------------------------------------------------------------------------------------------------------|----------------------------------------------------------------------------------------------------------------------------------------------------------------------------------------------------------------------------------------------------------------------------------------------------------------------------------------------------------------------------------------------------------------------------------------------------------------------------------|--------------------------------------------------------------------------------------------------------------------------------------------------------------------------------------------------------------------------------------|-----------------------------------------------------------------------------------------------------------------------------------------|
| Scognamiglio et al., 2011 <sup>45</sup> | Rome, Italy                                                                  | Implementation study in a cohort of individuals attending to the mobile unit, usually marginalized people (drug users, sex workers, homeless, immigrants) | For 43% of cases this was the first approach to HIV testing                                                                                                                                                                                                                                                                                                                                                                                                                      | Number of participants to whom it was the first approach to test<br><br>Authors reported a "high proportion of failure to return for confirmatory testing", but no number was provided                                               | Proportion (only never treated or tested but unaware with 95% CI)<br><br>Qualitative                                                    |
| Seewald et al., 2013 <sup>60</sup>      | Hospital-based methadone program in New York City                            | Retrospective before-after (before: routine testing; after: targeted testing) study in a cohort of opioid users                                           | Three of the 1121 (0.27%; 95% CI 0.13–0.52) were newly diagnosed with HIV. 3/3 HIV-positive received their rapid test results, only 1/3 received confirmatory blood test, and none adhered to their first HIV medical appointment                                                                                                                                                                                                                                                | Number of newly diagnosed individuals<br><br>Number of positive rapid test results received; proportion of rapid test positives who received confirmatory results<br><br>Number of patients who adhered to first medical appointment | Proportions with 95% CI<br><br>Proportion; no interval estimation                                                                       |
| Tepper et al., 2009 <sup>47</sup>       | 6 prenatal clinics associated with 6 hospitals from 6 major cities in the US | Diagnostic evaluation among women that were at least 34 weeks gestation and were not in labor and HIV status was unknown                                  | 7 women delivered before laboratory results were available; no women delivered before rapid test result. Time between sample collection and result = 25 min (range: 20-110 min) vs. 23h (range: 3.5 h–45 days) for laboratory-based; 273 (96%) were available within 1 hour.<br><br>Median test duration: point-of-care = 24 min vs laboratory-based testing (35 min).                                                                                                           | Number of cases in which results didn't arrived in time for PMTCT<br><br>Time between sample collection and result; results available within 1 hour; test duration                                                                   | Number<br><br>Results within 1 hour as proportions without interval estimation; other measures reported as median with or without range |
| Theron et al., 2011 <sup>48</sup>       | Somerset West district of Western Cape Province, South Africa                | RCT in women with unknown serostatus and at least 28 weeks pregnant being admitted for delivery                                                           | 34 babies returned for follow up. In intrapartum arm: all women in true labor received their test results before delivery; 18/19 newborns exposed to HIV in the intrapartum arm were prophylactically treated with NVP and AZT prior to hospital discharge, and the treatment was initiated within 12 h of birth in 17 of these newborns (89.5%). Postpartum arm: treatment was initiated within 12 h of birth in 21/26 newborns (81%) prophylactically treated with NVP and AZT | Number of babies positive for HIV among those who returned for follow-up<br><br>Number of results arrived in time; number of newborns treated prior discharge and within 12 h of birth<br><br>Number of results received in time     | Number<br><br>Proportions; no interval estimation<br><br>Proportions; no interval estimation                                            |

|                                       |                                   |                                                  |                                                                                                                                                                                                                                                                                                                                                                                                                                                                                                                                                                                                                                                                                                                                          |                                                                                                                                                                                                                                                                                                                                                                                                     |                                                                                                                                                                                                                                                                                                                   |
|---------------------------------------|-----------------------------------|--------------------------------------------------|------------------------------------------------------------------------------------------------------------------------------------------------------------------------------------------------------------------------------------------------------------------------------------------------------------------------------------------------------------------------------------------------------------------------------------------------------------------------------------------------------------------------------------------------------------------------------------------------------------------------------------------------------------------------------------------------------------------------------------------|-----------------------------------------------------------------------------------------------------------------------------------------------------------------------------------------------------------------------------------------------------------------------------------------------------------------------------------------------------------------------------------------------------|-------------------------------------------------------------------------------------------------------------------------------------------------------------------------------------------------------------------------------------------------------------------------------------------------------------------|
| Thomas et al., 2011 <sup>61</sup>     | N/A                               | Mixed methods study (cohort and survey) with MSM | <p>2% HIV positive.</p> <p>10% had never been tested previously</p>                                                                                                                                                                                                                                                                                                                                                                                                                                                                                                                                                                                                                                                                      | <p>Number of participants found to be positive</p> <p>Number of previously untested participants</p>                                                                                                                                                                                                                                                                                                | Proportion; no interval estimation                                                                                                                                                                                                                                                                                |
| van Rooyen et al., 2013 <sup>49</sup> | Rural KwaZulu-Natal, South Africa | Cohort of adults                                 | <p>214/739 (32%) were tested for the first time.</p> <p>201/739 (34%; IQR 27–43) HIV-infected participants were identified PCT; 73/201 (36%) newly diagnosed.</p> <p>48/58 couples of which both partners were tested for HIV had concordant serostatus (43 concordant negative and 5 concordant positive); 10/58 were serodiscordant.</p> <p>Linkage to care: 197/201 (99%), 199/201 (100%), and 196/201 (100%) completed their months 1, 3, and 6 follow-up visits, respectively.</p> <p>Cumulative probability of linkage to care: 57% at baseline, 96% after 6 months.</p> <p>Cumulative probability of ART initiation by 3 months: 86%. 36 participants initiated ART during the study.</p> <p>3/201 HIV+ died during the study</p> | <p>Number of participants tested for the first time</p> <p>Number of HIV-infected participants identified; number of newly diagnosed; number concordant (positive or negative) couples and of serodiscordant couples</p> <p>Number of patients who completed 1, 3, and 6 months' follow-up visits; linkage to care</p> <p>Treatment initiation</p> <p>Number of deaths among study participants</p> | <p>Proportion; no interval estimation</p> <p>Proportions; interquartile range reported for the proportion of HIV-infected participants identified</p> <p>Proportion without interval estimation; cumulative probability</p> <p>Cumulative probability; number of participants who initiated ART</p> <p>Number</p> |

|                                   |                                                                       |                                                                                                                      |                                                                                                                                                                                                                                                                                                                                                                         |                                                                                                                                                                                              |                                                |
|-----------------------------------|-----------------------------------------------------------------------|----------------------------------------------------------------------------------------------------------------------|-------------------------------------------------------------------------------------------------------------------------------------------------------------------------------------------------------------------------------------------------------------------------------------------------------------------------------------------------------------------------|----------------------------------------------------------------------------------------------------------------------------------------------------------------------------------------------|------------------------------------------------|
| Veloso et al., 2010 <sup>50</sup> | Public maternity hospitals in Rio de Janeiro and Porto Alegre, Brazil | Diagnostic evaluation; women with unknown HIV serostatus admitted for delivery and infants from HIV-positive mothers | <p>143/5217 (2.7%) positive results</p> <p>100% of newborns whose mothers were tested in the postpartum received post-exposure ZDV; 33.3% of them were not breastfed in Rio de Janeiro and none was breastfed in Porto Alegre.</p> <p>Exposure to breast milk was completely avoided for 96.8% and 51.1% of cases in Porto Alegre and Rio de Janeiro, respectively.</p> | <p>Number of positive results</p> <p>PMTCT initiated; prevention of exposure to breast milk</p>                                                                                              | Proportion; no interval estimation             |
| Viani et al., 2013 <sup>51</sup>  | Tijuana General Hospital in Baja California, Mexico                   | Diagnostic evaluation with pregnant women                                                                            | <p>214 (32%) were tested for the first time with 73 (36%) new diagnoses.</p> <p>26 women had positive parallel rapid HIV testing (24 tested positive by confirmatory WB).</p> <p>"Of the HIV-infected participants, 197 (99%), 199 (100%), and 196 (100%) completed their months 1, 3, and 6 follow-up visits, respectively."</p>                                       | <p>Number of participants tested for the first time; Number of new diagnosis; number of diagnosis confirmed</p> <p>Number of patients who completed 1, 3, and 6 months' follow-up visits</p> | Proportion without interval estimation; number |
| White et al., 2009 <sup>52</sup>  | Urban ED in Oakland, California                                       | Cohort of medically stable patients above 12 years-old                                                               | 56 (0.7%) positive test; 90 (89.1%) patients with newly diagnosed HIV infection linked to follow up                                                                                                                                                                                                                                                                     | Number of positive screening rapid test; number of patients linked to follow-up                                                                                                              | Proportion; no interval estimation             |

## References

1. Anaya H, Feld J, Hoang T, Knapp H, Asch S. Implementing an HIV rapid testing intervention for homeless veterans in shelter settings within Los Angeles county. *Journal of the International Association of Physicians in AIDS Care* 2010; **9** (1): 47.
2. Arfai N, Squires K, Ezeala Y, et al. Demographics and risk factors of patients who decline opt-in hiv screenings in an urban emergency department. *Ann Emerg Med* 2011; **1**: S200.
3. Ashby J, Braithewaite B, Walsh J, Gnani S, Fidler S, Cooke G. HIV testing uptake and acceptability in an inner city polyclinic. *AIDS Care* 2012; **24**(7): 905-9.
4. Batey DS, Hogan VL, Cantor R, et al. Short communication routine HIV testing in the emergency department: assessment of patient perceptions. *AIDS Res Hum Retroviruses* 2012; **28**(4): 352-6.
5. Beckwith CG, Bazerman L, Cornwall AH, et al. An evaluation of a routine opt-out rapid HIV testing program in a Rhode Island jail. *AIDS Educ Prev* 2011; **23**(3 Suppl): 96-109.
6. Bowles KE, Clark HA, Tai E, et al. Implementing rapid HIV testing in outreach and community settings: results from an advancing HIV prevention demonstration project conducted in seven U.S. cities. *Public Health Rep* 2008; **123** Suppl 3: 78-85.
7. Bucher JB, Thomas KM, Guzman D, Riley E, Dela Cruz N, Bangsberg DR. Community-based rapid HIV testing in homeless and marginally housed adults in San Francisco. *HIV Med* 2007; **8**(1): 28-31.
8. Burns F, Edwards S, Woods J, et al. Acceptability, feasibility and costs of universal offer of rapid point of care testing for HIV in an acute admissions unit: Results of the RAPID project. *HIV Medicine* 2013; **14**(SUPPL.3): 10-4.
9. Carballo-Diequez A, Frasca T, Balan I, Ibitoye M, Dolezal C. Use of a rapid HIV home test prevents HIV exposure in a high risk sample of men who have sex with men. *AIDS Behav* 2012; **16**(7): 1753-60.
10. Choko AT, Desmond N, Webb EL, et al. The uptake and accuracy of oral kits for HIV self-testing in high HIV prevalence setting: a cross-sectional feasibility study in Blantyre, Malawi. *PLoS Med* 2011; **8**(10): e1001102.
11. Cirone MV, Probst BD, Stake CE, et al. The implementation of opt-in rapid HIV testing in an urban emergency department. *Annals of Emergency Medicine* 2013; **1**: S64.
12. Criniti SM, Aaron E, Levine AB. Using the rapid HIV test to rescreen women in the third trimester of pregnancy. *J Midwifery Womens Health* 2009; **54**(6): 492-6.
13. Darling KE, Diserens EA, N'Garambe C, et al. A cross-sectional survey of attitudes to HIV risk and rapid HIV testing among clients of sex workers in Switzerland. *Sex Transm Infect* 2012; **88**(6): 462-4.
14. Ekouevi DK, Kariyare BG, Coffie PA, et al. Feasibility and acceptability of rapid HIV screening in a labour ward in Togo. *Journal of the International AIDS Society* 2013; **15**(2).
15. Garrard N, Peck J, Ruf M, Lockyer S. Opt-out HIV testing pilot in termination of pregnancy services - 11-month service evaluation. *HIV Med* 2010; **11**: 69.

16. Gaydos CA, Solis M, Hsieh YH, Jett-Goheen M, Nour S, Rothman RE. Use of tablet-based kiosks in the emergency department to guide patient HIV self-testing with a point-of-care oral fluid test. *International Journal of STD & AIDS* 2013; **24**(9): 716-21.
17. Gennotte AF, Semaille P, Ellis C, et al. Feasibility and acceptability of HIV screening through the use of rapid tests by general practitioners in a Brussels area with a substantial African community. *HIV Medicine* 2013; **14**(SUPPL.3): 57-60.
18. Herbert R, Ashraf AN, Yates TA, et al. Nurse-delivered universal point-of-care testing for HIV in an open-access returning traveller clinic. *HIV Med* 2012; **13**(8): 499-504.
19. Hooshyar D, Suris AM, Czarnogorski M, Lepage JP, Bedimo R, North CS. Rapid HIV testing experience at Veterans Affairs North Texas Health Care System's Homeless Stand Downs. *AIDS Care - Psychological and Socio-Medical Aspects of AIDS/HIV* 2014; **26**(1): 95-9.
20. Jabbari H, Aghamollaie S, Esmaeeli Djavid G, et al. Frequency of HIV Infection among Sailors in South of Iran by Rapid HIV Test. *AIDS Res Treat* 2011; **2011**: 612475.
21. Jabbari H, Sharifi AH, SeyedAlinaghi S, et al. Assessing the prevalence of HIV among Afghan immigrants in Iran through rapid HIV testing in the field. *Acta Med Iran* 2011; **49**(7): 478-9.
22. Kania D, Fao P, Valéa D, et al. Low prevalence rate of indeterminate serological human immunodeficiency virus results among pregnant women from Burkina Faso, West Africa. *J Clin Microbiol* 2010; **48**(4): 1333-6.
23. Levin M, Mathema H, Stinson K, Jennings K. Acceptability, feasibility and impact of routine screening to detect undiagnosed HIV infection in 17 - 24-month-old children in the western sub-district of Cape Town. *S Afr Med J* 2012; **102**(4): 245-8.
24. Macgowan R, Margolis A, Richardson-Moore A, et al. Voluntary rapid human immunodeficiency virus (HIV) testing in jails. *Sex Transm Dis* 2009; **36**(2 Suppl): S9-13.
25. Manavi K, Williams G, Newton R. The uptake of HIV and syphilis testing in a nurse-delivered service during Gay Pride events. *International Journal of STD and AIDS* 2012; **23**(12): 887-9.
26. Martin EG, Salaru G, Paul SM, Cadoff EM. Use of a rapid HIV testing algorithm to improve linkage to care. *J Clin Virol* 2011; **52** Suppl 1: S11-5.
27. Mathe MK, Rigo J, Sontag D, Gerard C. Prevalence of HIV infection among pregnant women. A study in rural Africa. [French] Prevalence de l'infection par le VIH chez les femmes enceintes. Etude en milieu rural africain. *Rev Epidemiol Sante Publique* 2008; **56**(6): 407-13.
28. Melo M, Varella I, Castro A, et al. HIV voluntary counseling and testing of couples during maternal labor and delivery: The TRIPAI couples study. *Sexually Transmitted Diseases* 2013; **40**(9): 704-9.
29. Melvin AJ, Alarcon J, Velasquez C, et al. Rapid HIV type 1 testing of women presenting in late pregnancy with unknown HIV status in Lima, Peru. *AIDS Res Hum Retroviruses* 2004; **20**(10): 1046-52.
30. Menacho I, Sequeira E, Muns M, et al. Comparison of two HIV testing strategies in primary care centres: Indicator-condition-guided testing vs. testing of those with non-indicator conditions. *HIV Medicine* 2013; **14**(SUPPL.3): 33-7.

31. Mkwanzazi NB, Patel D, Newell ML, et al. Rapid testing may not improve uptake of HIV testing and same day results in a rural South African community: a cohort study of 12,000 women. *PLoS One* 2008; **3**(10): e3501.
32. Mullins TLK, Braverman PK, Dorn LD, Kollar LM, Kahn JA. Adolescent preferences for human immunodeficiency virus testing methods and impact of rapid tests on receipt of results. *Journal of Adolescent Health* 2010; **46**(2): 162-8.
33. Mungrue K, Sahadool S, Evans R, et al. Assessing the HIV rapid test in the fight against the HIV/AIDS epidemic in Trinidad. *HIV/AIDS - Research and Palliative Care* 2013; **5**: 191-8.
34. Ndongoki C, Brou H, Timite-Konan M, et al. Universal HIV Screening at Postnatal Points of Care: Which Public Health Approach for Early Infant Diagnosis in Cote d'Ivoire? *PLoS ONE* 2013; **8**(8).
35. Nelson AK, Caldas A, Sebastian JL, et al. Community-based rapid oral human immunodeficiency virus testing for tuberculosis patients in Lima, Peru. *Am J Trop Med Hyg* 2012; **87**(3): 399-406.
36. Newbould C, Monrose C, Dodge J, et al. Don't forget the children - Ongoing experience of a paediatric HIV unit using point-of-care tests in children born to HIV-positive parents - How far have we come? *HIV Med* 2010; **11**: 67-8.
37. Noble H, Wright G, Young E. HIV point of care testing in the emergency department. *HIV Med* 2012; **13**: 61.
38. Ouladlalsen A, Bensghir R, Karkouri M, et al. [Benefit of the rapid test determine HIV1/2 in the clinical diagnosis of HIV infection in Ibn Rochd hospital of Casablanca, Morocco]. *Rev Epidemiol Sante Publique* 2012; **60**(4): 333-8.
39. Pai NP, Barick R, Tulsy JP, et al. Impact of round-the-clock, rapid oral fluid HIV testing of women in labor in rural India. *PLoS Med* 2008; **5**(5): e92.
40. Parisi MR, Soldini L, Vidoni G, et al. Cross-sectional study of community serostatus to highlight undiagnosed HIV infections with oral fluid HIV-1/2 rapid test in non-conventional settings. *New Microbiologica* 2013; **36**(2): 121-32.
41. Ramachandran R, Chandrasekaran V, Muniyandi M, Jaggarajamma K, Bagchi A, Sahu S. Prevalence and Risk Factors of HIV Infection among Clients Attending ICTCs in Six Districts of Tamilnadu, South India. *AIDS Res Treat* 2011; **2011**: 650321.
42. Robbins CL, Zapata L, Kissin DM, et al. Multicity HIV seroprevalence in street youth, Ukraine. *Int J STD AIDS* 2010; **21**(7): 489-96.
43. Ruutel K, Ustina V, Parker RD. Piloting HIV rapid testing in community-based settings in Estonia. *Scand J Public Health* 2012; **40**(7): 629-33.
44. Sattin RW, Wilde JA, Freeman AE, Miller KM, Dias JK. Rapid HIV testing in a southeastern emergency department serving a semiurban-semirural adolescent and adult population. *Ann Emerg Med* 2011; **58**(1 Suppl 1): S60-4.
45. Scognamiglio P, Chiaradia G, Sciarrone MR, et al. Final results of an outreach program of HIV rapid testing among marginalized people living in Rome, Italy. *Infection* 2011; **39**: S24.

46. Stenstrom R, Grafstein E, Poureslami I, et al. Feasibility of and patient satisfaction with HIV point-of-care testing in the emergency department. *Canadian Journal of Emergency Medicine* 2013; **15**: S30.
47. Tepper NK, Farr SL, Danner SP, et al. Rapid human immunodeficiency virus testing in obstetric outpatient settings: the MIRIAD study. *Am J Obstet Gynecol* 2009; **201**(1): 31 e1-6.
48. Theron GB, Shapiro DE, Van Dyke R, et al. Rapid intrapartum or postpartum HIV testing at a midwife obstetric unit and a district hospital in South Africa. *Int J Gynaecol Obstet* 2011; **113**(1): 44-9.
49. van Rooyen H, Barnabas RV, Baeten JM, et al. High HIV testing uptake and linkage to care in a novel program of home-based HIV counseling and testing with facilitated referral in KwaZulu-Natal, South Africa. *Journal of Acquired Immune Deficiency Syndromes: JAIDS* 2013; **64**(1): e1-8.
50. Veloso VG, Bastos FI, Portela MC, et al. HIV rapid testing as a key strategy for prevention of mother-to-child transmission in Brazil. *Rev Saude Publica* 2010; **44**(5): 803-11.
51. Viani RM, Araneta MRG, Spector SA. Parallel rapid HIV testing in pregnant women at Tijuana General Hospital, Baja California, Mexico. *AIDS Research and Human Retroviruses* 2013; **29**(3): 429-34.
52. White DA, Scribner AN, Schulden JD, Branson BM, Heffelfinger JD. Results of a rapid HIV screening and diagnostic testing program in an urban emergency department. *Ann Emerg Med* 2009; **54**(1): 56-64.
53. Young PW, Mahomed M, Horth RZ, Shiraishi RW, Jani IV. Routine data from prevention of mother-to-child transmission (PMTCT) HIV testing not yet ready for HIV surveillance in Mozambique: a retrospective analysis of matched test results. *BMC Infect Dis* 2013; **13**: 96.
54. Becker ML, Thompson LH, Pindera C, et al. Feasibility and success of HIV point-of-care testing in an emergency department in an urban Canadian setting. *Canadian Journal of Infectious Diseases and Medical Microbiology* 2013; **24**(1): 27-31.
55. Castel AD, Magnus M, Peterson J, et al. Implementing a novel citywide rapid HIV testing campaign in Washington, D.C.: findings and lessons learned. *Public Health Rep* 2012; **127**(4): 422-31.
56. Connors EE, Hagedorn HJ, Butler JN, et al. Evaluating the implementation of nurse-initiated HIV rapid testing in three Veterans Health Administration substance use disorder clinics. *International Journal of STD and AIDS* 2012; **23**(11): 799-805.
57. Guenter D, Greer J, Barbara A, Robinson G, Roberts J, Browne G. Rapid point-of-care HIV testing in community-based anonymous testing program: a valuable alternative to conventional testing. *AIDS Patient Care STDS* 2008; **22**(3): 195-204.
58. Nobrega I, Dantas P, Rocha P, et al. Syphilis and HIV-1 among parturient women in Salvador, Brazil: Low prevalence of syphilis and high rate of loss to follow-up in HIV-infected women. *Brazilian Journal of Infectious Diseases* 2013; **17**(2): 184-93.
59. Russell TV, Do AN, Setik E, et al. Sexual risk behaviors for HIV/AIDS in Chuuk State, Micronesia: the case for HIV prevention in vulnerable remote populations. *PLoS One* 2007; **2**(12): e1283.

60. Seewald R, Bruce RD, Elam R, et al. Effectiveness and feasibility study of routine HIV rapid testing in an urban methadone maintenance treatment program. *American Journal of Drug and Alcohol Abuse* 2013; **39**(4): 247-51.
61. Thomas R, Machouf N, Trottier B, et al. A new approach to encourage HIV testing in high-risk populations at the clinique l'actuel. *Sex Transm Infect* 2011; **87**: A201.
62. Keller S, Jones J, Erbeling E. Choice of Rapid HIV testing and entrance into care in Baltimore City sexually transmitted infections clinics. *AIDS Patient Care STDS* 2011; **25**(4): 237-43.
63. Marsh KA, Reynolds GL, Rogala BE, Fisher DG, Napper LE. Who chooses a rapid test for HIV in Los Angeles County, California? *Eval Health Prof* 2010; **33**(2): 177-96.
64. Benzaken A, Pinto VM, Carvalho CH, Peeling R. Increasing access to hiv and syphilis screening in remote areas using rapid tests. *Sex Transm Infect* 2011; **87**: A2.
65. Ganesan A, Thatchinamoorthy G, Saramini S. Feasibility of testing antibodies to HIV from filter paper using HIV rapid test kits. *J Int AIDS Soc* 2010; **13**.
66. Hoyos J, de la Fuente L, Fernandez S, et al. [Street outreach rapid HIV testing in university settings: a priority strategy?]. *Gac Sanit* 2012; **26**(2): 131-7.
67. Jerene D, Endale A, Lindtjorn B. Acceptability of HIV counselling and testing among tuberculosis patients in south Ethiopia. *BMC Int Health Hum Rights* 2007; **7**: 4.
68. Mikolasova G, Bonnach C, Monte CTW, et al. Relative low number of new hiv cases detected in rural district Bunda in Northwest Tanzania. *American Journal of Tropical Medicine and Hygiene* 2013; **1**: 234.
69. Morin SF, Khumalo-Sakutukwa G, Charlebois ED, et al. Removing barriers to knowing HIV status: same-day mobile HIV testing in Zimbabwe. *J Acquir Immune Defic Syndr* 2006; **41**(2): 218-24.
70. Mwembo-Tambwe ANK, Kalenga MK, Donnen P, et al. HIV testing among women in delivery rooms in Lubumbashi, DR Congo: A catch-up strategy for prevention of mother-to-child transmission. [French] Depistage du VIH en salle de travail a Lubumbashi, Republique democratique du Congo. Une strategie de rattrapage dans le cadre de la prevention de la transmission de la mere a l'enfant. *Revue d'Epidemiologie et de Sante Publique* 2013; **61**(1): 21-7.
71. Portman M, Aung S, Brigstock-Barron O, et al. T'HIV'K goes North: Outcomes and experience of UK HIV Testing week in a northern UK city. *HIV Medicine* 2013; **14**: 19.
72. Qvist T, Cowan SA, Graugaard C, Helleberg M. High linkage to care in a community-based rapid HIV testing and counseling project among men who have sex with men in copenhagen. *Sexually Transmitted Diseases* 2014; **41**(3): 209-14.
73. Anaya HD, Hoang T, Golden JF, et al. Improving HIV screening and receipt of results by nurse-initiated streamlined counseling and rapid testing. *J Gen Intern Med* 2008; **23**(6): 800-7.
74. Beckwith CG, Liu T, Bazerman LB, et al. HIV risk behavior before and after HIV counseling and testing in jail: a pilot study. *J Acquir Immune Defic Syndr* 2010; **53**(4): 485-90.

75. Hernandez B, Mateo N, Walter J, Setterholm K. Targeted bedside emergency department hiv screening does not impact length of stay. *Academic Emergency Medicine* 2013; **1**): S200.
76. Hoyos J, Fernandez-Balbuena S, de la Fuente L, et al. Never tested for HIV in Latin-American migrants and Spaniards: prevalence and perceived barriers. *J Int AIDS Soc* 2013; **16**: 18560.
77. Mayhood MK, Afwamba IA, Odhiambo CO, et al. Validation, performance under field conditions, and cost-effectiveness of Capillus HIV-1/HIV-2 and determine HIV-1/2 rapid human immunodeficiency virus antibody assays using sequential and parallel testing algorithms in Tanzania. *J Clin Microbiol* 2008; **46**(12): 3946-51.
78. Mehta SD, Hall J, Greenwald JL, Cranston K, Skolnik PR. Patient risks, outcomes, and costs of voluntary HIV testing at five testing sites within a medical center. *Public Health Rep* 2008; **123**(5): 608-17.
79. Metsch LR, Feaster DJ, Gooden L, et al. Implementing rapid HIV testing with or without risk-reduction counseling in drug treatment centers: results of a randomized trial. *Am J Public Health* 2012; **102**(6): 1160-7.
80. Puro V, Francisci D, Sighinolfi L, et al. Benefits of a rapid HIV test for evaluation of the source patient after occupational exposure of healthcare workers. *J Hosp Infect* 2004; **57**(2): 179-82.
81. Schulden JD, Song B, Barros A, et al. Rapid HIV testing in transgender communities by community-based organizations in three cities. *Public Health Rep* 2008; **123 Suppl 3**: 101-14.
